# Supplementary material for: The AgraSim (Agricultural Simulator) facility for the comprehensive experimental simulation and analysis of environmental impacts on processes in the soil-plant-atmosphere system
Source: Copernicus journal article supplement (doi:10.5194/gi-14-353-2025), 2025-11-27
Supplement: Supplementary file 1 [file Climate data set Agrasim.xlsx]

## Sheet: Wetterdaten_Selhausen_2017_Agra
Index	Date/Time	Air temperature [°C]	Relative humidity [°C]	Soil temperature [°C]	Irrigation [mm]	Light channel warm white [umol]	Light channel Cold white [umol]	Light channel UV [umol]	Light channel blue [umol]	Light channel turquoise [umol]	Light channel green [umol]	Light channel red 660/690 nm [umol]	Light cannel red 740 nm [umol]
1	2017-01-01 00:05:00	-5	80	13	0	0	0	0	0	0	0	0	0
2	2017-01-01 00:15:00	-5	80	13	0	0	0	0	0	0	0	0	0
3	2017-01-01 00:25:00	-5	80	13	0	0	0	0	0	0	0	0	0
4	2017-01-01 00:35:00	-5	80	13	0	0	0	0	0	0	0	0	0
5	2017-01-01 00:45:00	-5	80	13	0	0	0	0	0	0	0	0	0
6	2017-01-01 00:55:00	-5	80	13	0	0	0	0	0	0	0	0	0
7	2017-01-01 01:05:00	-5	80	13	0	0	0	0	0	0	0	0	0
8	2017-01-01 01:15:00	-5	80	13	0	0	0	0	0	0	0	0	0
9	2017-01-01 01:25:00	-5	80	13	0	0	0	0	0	0	0	0	0
10	2017-01-01 01:35:00	-5	80	13	0	0	0	0	0	0	0	0	0
11	2017-01-01 01:45:00	-5	80	13	0	0	0	0	0	0	0	0	0
12	2017-01-01 01:55:00	-5	80	13	0	0	0	0	0	0	0	0	0
13	2017-01-01 02:05:00	-5	80	13	0	0	0	0	0	0	0	0	0
14	2017-01-01 02:15:00	-5	80	13	0	0	0	0	0	0	0	0	0
15	2017-01-01 02:25:00	-5	80	13	0	0	0	0	0	0	0	0	0
16	2017-01-01 02:35:00	-5	80	13	0	0	0	0	0	0	0	0	0
17	2017-01-01 02:45:00	-5	80	13	0	0	0	0	0	0	0	0	0
18	2017-01-01 02:55:00	-5	80	13	0	0	0	0	0	0	0	0	0
19	2017-01-01 03:05:00	-5	80	13	0	0	0	0	0	0	0	0	0
20	2017-01-01 03:15:00	-5	80	13	0	0	0	0	0	0	0	0	0
21	2017-01-01 03:25:00	-5	80	13	0	0	0	0	0	0	0	0	0
22	2017-01-01 03:35:00	-5	80	13	0	0	0	0	0	0	0	0	0
23	2017-01-01 03:45:00	-5	80	13	0	0	0	0	0	0	0	0	0
24	2017-01-01 03:55:00	-5	80	13	0	0	0	0	0	0	0	0	0
25	2017-01-01 04:05:00	-5	80	13	0	0	0	0	0	0	0	0	0
26	2017-01-01 04:15:00	-5	80	13	0	0	0	0	0	0	0	0	0
27	2017-01-01 04:25:00	-5	80	13	0	0	0	0	0	0	0	0	0
28	2017-01-01 04:35:00	-5	80	13	0	0	0	0	0	0	0	0	0
29	2017-01-01 04:45:00	-5	80	13	0	0	0	0	0	0	0	0	0
30	2017-01-01 04:55:00	-5	80	13	0	0	0	0	0	0	0	0	0
31	2017-01-01 05:05:00	-5	80	13	0	0	0	0	0	0	0	0	0
32	2017-01-01 05:15:00	-5	80	13	0	0	0	0	0	0	0	0	0
33	2017-01-01 05:25:00	-5	80	13	0	0	0	0	0	0	0	0	0
34	2017-01-01 05:35:00	-4.9	80	13	0	0	0	0	0	0	0	0	0
35	2017-01-01 05:45:00	-5	80	13	0	0	0	0	0	0	0	0	0
36	2017-01-01 05:55:00	-5	80	13	0	0	0	0	0	0	0	0	0
37	2017-01-01 06:05:00	-5	80	13	0	0	0	0	0	0	0	0	0
38	2017-01-01 06:15:00	-4.7	80	13	0	0	0	0	0	0	0	0	0
39	2017-01-01 06:25:00	-4.6	80	13	0	0	0	0	0	0	0	0	0
40	2017-01-01 06:35:00	-4.6	80	13	0	0	0	0	0	0	0	0	0
41	2017-01-01 06:45:00	-4.8	80	13	0	0	0	0	0	0	0	0	0
42	2017-01-01 06:55:00	-4.9	80	13	0	0	0	0	0	0	0	0	0
43	2017-01-01 07:05:00	-5	80	13	0	0	0	0	0	0	0	0	0
44	2017-01-01 07:15:00	-5	80	13	0	0	0	0	0	0	0	0	0
45	2017-01-01 07:25:00	-5	80	13	0	2	0	0	0	0	0	0	1
46	2017-01-01 07:35:00	-5	80	13	0	4	0	0	1	0	0	1	1
47	2017-01-01 07:45:00	-5	80	13	0	7	1	1	1	1	1	2	2
48	2017-01-01 07:55:00	-5	80	13	0	12	1	1	2	1	1	3	4
49	2017-01-01 08:05:00	-5	80	13	0	19	2	2	3	2	2	4	6
50	2017-01-01 08:15:00	-4.7	80	13	0	26	2	3	4	3	3	6	8
51	2017-01-01 08:25:00	-4.4	80	13	0	36	3	4	6	4	4	8	11
52	2017-01-01 08:35:00	-4.2	80	13	0	47	4	5	7	5	5	11	15
53	2017-01-01 08:45:00	-3.9	80	13	0	58	5	6	9	6	6	13	19
54	2017-01-01 08:55:00	-3.6	80	13	0	71	6	8	11	7	7	16	23
55	2017-01-01 09:05:00	-3.3	80	13	0	84	7	9	14	8	9	19	27
56	2017-01-01 09:15:00	-3.4	80	13	0	97	8	10	16	10	10	22	31
57	2017-01-01 09:25:00	-3.1	80	13	0	110	9	12	18	11	11	25	35
58	2017-01-01 09:35:00	-2.7	80	13	0	122	10	13	20	12	13	28	39
59	2017-01-01 09:45:00	-2.5	80	13	0	135	12	14	22	14	14	31	43
60	2017-01-01 09:55:00	-2.1	80	13	0	147	12	16	24	15	15	33	47
61	2017-01-01 10:05:00	-1.8	80	13	0	157	13	17	25	16	16	35	50
62	2017-01-01 10:15:00	-1.6	80	13	0	166	14	18	27	17	17	38	53
63	2017-01-01 10:25:00	-1.1	80	13	0	175	15	19	28	17	18	40	56
64	2017-01-01 10:35:00	-0.4	80	13	0	182	16	19	29	18	19	41	58
65	2017-01-01 10:45:00	-0.1	80	13	0	190	16	20	31	19	19	43	61
66	2017-01-01 10:55:00	0.1	80	13	0	198	17	21	32	20	20	45	63
67	2017-01-01 11:05:00	-0.4	80	13	0	213	18	23	34	21	22	48	68
68	2017-01-01 11:15:00	-0.7	80	13	0	205	17	22	33	20	21	46	65
69	2017-01-01 11:25:00	-0.6	80	13	0	207	18	22	33	21	21	47	66
70	2017-01-01 11:35:00	-0.5	80	13	0	207	18	22	33	21	21	47	66
71	2017-01-01 11:45:00	-0.1	80	13	0	206	18	22	33	21	21	47	66
72	2017-01-01 11:55:00	0	80	13	0	202	17	22	32	20	21	46	65
73	2017-01-01 12:05:00	0.2	80	13	0	196	17	21	32	20	20	44	63
74	2017-01-01 12:15:00	0.5	80	13	0	191	16	20	31	19	20	43	61
75	2017-01-01 12:25:00	0.5	79.8	13	0	176	15	19	28	18	18	40	56
76	2017-01-01 12:35:00	0.9	78.2	13	0	189	16	20	30	19	19	43	60
77	2017-01-01 12:45:00	1.1	77.1	13	0	162	14	17	26	16	17	37	52
78	2017-01-01 12:55:00	1.2	76.8	13	0	150	13	16	24	15	15	34	48
79	2017-01-01 13:05:00	1.1	75	13	0	120	10	13	19	12	12	27	38
80	2017-01-01 13:15:00	1.1	74.5	13	0	121	10	13	19	12	12	27	39
81	2017-01-01 13:25:00	1	77.3	13	0	108	9	12	17	11	11	24	34
82	2017-01-01 13:35:00	0.9	77.4	13	0	101	9	11	16	10	10	23	32
83	2017-01-01 13:45:00	1	79	13	0	126	11	13	20	13	13	29	40
84	2017-01-01 13:55:00	1.4	75.4	13	0	121	10	13	19	12	12	27	39
85	2017-01-01 14:05:00	1.7	75.7	13	0	111	9	12	18	11	11	25	35
86	2017-01-01 14:15:00	1.7	74.1	13	0	95	8	10	15	9	10	21	30
87	2017-01-01 14:25:00	1.7	74.3	13	0	82	7	9	13	8	8	19	26
88	2017-01-01 14:35:00	1.5	76.9	13	0	70	6	7	11	7	7	16	22
89	2017-01-01 14:45:00	1.3	77.8	13	0	47	4	5	7	5	5	11	15
90	2017-01-01 14:55:00	1.2	78.6	13	0	35	3	4	6	3	4	8	11
91	2017-01-01 15:05:00	1.1	79.6	13	0	21	2	2	3	2	2	5	7
92	2017-01-01 15:15:00	1.2	79.5	13	0	12	1	1	2	1	1	3	4
93	2017-01-01 15:25:00	1.1	80	13	0	7	1	1	1	1	1	2	2
94	2017-01-01 15:35:00	0.9	80	13	0	4	0	0	1	0	0	1	1
95	2017-01-01 15:45:00	1.3	78	13	0	2	0	0	0	0	0	0	0
96	2017-01-01 15:55:00	1.4	76	13	0	1	0	0	0	0	0	0	0
97	2017-01-01 16:05:00	1.3	75.9	13	0	0	0	0	0	0	0	0	0
98	2017-01-01 16:15:00	1.1	77.2	13	0	0	0	0	0	0	0	0	0
99	2017-01-01 16:25:00	1	78.6	13	0	0	0	0	0	0	0	0	0
100	2017-01-01 16:35:00	0.8	80	13	0	0	0	0	0	0	0	0	0
101	2017-01-01 16:45:00	0.6	80	13	0	0	0	0	0	0	0	0	0
102	2017-01-01 16:55:00	0.3	80	13	0	0	0	0	0	0	0	0	0
103	2017-01-01 17:05:00	0.1	80	13	0	0	0	0	0	0	0	0	0
104	2017-01-01 17:15:00	0.3	80	13	0	0	0	0	0	0	0	0	0
105	2017-01-01 17:25:00	0.2	80	13	0	0	0	0	0	0	0	0	0
106	2017-01-01 17:35:00	0.2	80	13	0	0	0	0	0	0	0	0	0
107	2017-01-01 17:45:00	0	80	13	0	0	0	0	0	0	0	0	0
108	2017-01-01 17:55:00	0.2	80	13	0	0	0	0	0	0	0	0	0
109	2017-01-01 18:05:00	0.1	80	13	0	0	0	0	0	0	0	0	0
110	2017-01-01 18:15:00	0.2	80	13	0	0	0	0	0	0	0	0	0
111	2017-01-01 18:25:00	0.2	80	13	0	0	0	0	0	0	0	0	0
112	2017-01-01 18:35:00	0.3	80	13	0	0	0	0	0	0	0	0	0
113	2017-01-01 18:45:00	0.2	80	13	0	0	0	0	0	0	0	0	0
114	2017-01-01 18:55:00	0.3	80	13	0	0	0	0	0	0	0	0	0
115	2017-01-01 19:05:00	0.4	80	13	0	0	0	0	0	0	0	0	0
116	2017-01-01 19:15:00	0.3	80	13	0	0	0	0	0	0	0	0	0
117	2017-01-01 19:25:00	0.4	80	13	0	0	0	0	0	0	0	0	0
118	2017-01-01 19:35:00	0.3	80	13	0	0	0	0	0	0	0	0	0
119	2017-01-01 19:45:00	0.2	80	13	0	0	0	0	0	0	0	0	0
120	2017-01-01 19:55:00	0.2	80	13	0	0	0	0	0	0	0	0	0
121	2017-01-01 20:05:00	0.3	80	13	0	0	0	0	0	0	0	0	0
122	2017-01-01 20:15:00	0.3	80	13	0	0	0	0	0	0	0	0	0
123	2017-01-01 20:25:00	0.4	80	13	0	0	0	0	0	0	0	0	0
124	2017-01-01 20:35:00	0.4	80	13	0	0	0	0	0	0	0	0	0
125	2017-01-01 20:45:00	0.3	80	13	0	0	0	0	0	0	0	0	0
126	2017-01-01 20:55:00	0.5	80	13	0	0	0	0	0	0	0	0	0
127	2017-01-01 21:05:00	0.5	80	13	0	0	0	0	0	0	0	0	0
128	2017-01-01 21:15:00	0.5	80	13	0	0	0	0	0	0	0	0	0
129	2017-01-01 21:25:00	0.5	80	13	0	0	0	0	0	0	0	0	0
130	2017-01-01 21:35:00	0.6	80	13	0	0	0	0	0	0	0	0	0
131	2017-01-01 21:45:00	1	80	13	0	0	0	0	0	0	0	0	0
132	2017-01-01 21:55:00	1.1	80	13	0	0	0	0	0	0	0	0	0
133	2017-01-01 22:05:00	1.2	80	13	0	0	0	0	0	0	0	0	0
134	2017-01-01 22:15:00	1.6	80	13	0	0	0	0	0	0	0	0	0
135	2017-01-01 22:25:00	1.5	80	13	0	0	0	0	0	0	0	0	0
136	2017-01-01 22:35:00	1.6	80	13	0	0	0	0	0	0	0	0	0
137	2017-01-01 22:45:00	1.5	80	13	0	0	0	0	0	0	0	0	0
138	2017-01-01 22:55:00	1.5	80	13	0	0	0	0	0	0	0	0	0
139	2017-01-01 23:05:00	1.3	80	13	0	0	0	0	0	0	0	0	0
140	2017-01-01 23:15:00	1.3	80	13	0	0	0	0	0	0	0	0	0
141	2017-01-01 23:25:00	1.3	80	13	0	0	0	0	0	0	0	0	0
142	2017-01-01 23:35:00	1.2	80	13	0	0	0	0	0	0	0	0	0
143	2017-01-01 23:45:00	1.1	80	13	0	0	0	0	0	0	0	0	0
144	2017-01-01 23:55:00	1.1	80	13	0	0	0	0	0	0	0	0	0
145	2017-01-02 00:05:00	1	80	13	0	0	0	0	0	0	0	0	0
146	2017-01-02 00:15:00	1	80	13	0	0	0	0	0	0	0	0	0
147	2017-01-02 00:25:00	1	80	13	0	0	0	0	0	0	0	0	0
148	2017-01-02 00:35:00	0.9	80	13	0	0	0	0	0	0	0	0	0
149	2017-01-02 00:45:00	0.9	80	13	0	0	0	0	0	0	0	0	0
150	2017-01-02 00:55:00	0.9	80	13	0	0	0	0	0	0	0	0	0
151	2017-01-02 01:05:00	0.9	80	13	0	0	0	0	0	0	0	0	0
152	2017-01-02 01:15:00	0.9	80	13	0	0	0	0	0	0	0	0	0
153	2017-01-02 01:25:00	0.9	80	13	0	0	0	0	0	0	0	0	0
154	2017-01-02 01:35:00	1	80	13	0	0	0	0	0	0	0	0	0
155	2017-01-02 01:45:00	1	80	13	0	0	0	0	0	0	0	0	0
156	2017-01-02 01:55:00	1	80	13	0	0	0	0	0	0	0	0	0
157	2017-01-02 02:05:00	0.9	80	13	0	0	0	0	0	0	0	0	0
158	2017-01-02 02:15:00	0.9	80	13	0	0	0	0	0	0	0	0	0
159	2017-01-02 02:25:00	0.8	80	13	0	0	0	0	0	0	0	0	0
160	2017-01-02 02:35:00	0.7	80	13	0	0	0	0	0	0	0	0	0
161	2017-01-02 02:45:00	0.5	80	13	0	0	0	0	0	0	0	0	0
162	2017-01-02 02:55:00	0.4	80	13	0	0	0	0	0	0	0	0	0
163	2017-01-02 03:05:00	0.3	80	13	0	0	0	0	0	0	0	0	0
164	2017-01-02 03:15:00	0.2	80	13	0	0	0	0	0	0	0	0	0
165	2017-01-02 03:25:00	0.2	80	13	0	0	0	0	0	0	0	0	0
166	2017-01-02 03:35:00	0.1	80	13	0	0	0	0	0	0	0	0	0
167	2017-01-02 03:45:00	0.1	80	13	0	0	0	0	0	0	0	0	0
168	2017-01-02 03:55:00	0.1	80	13	0	0	0	0	0	0	0	0	0
169	2017-01-02 04:05:00	0.1	80	13	0	0	0	0	0	0	0	0	0
170	2017-01-02 04:15:00	0	80	13	0	0	0	0	0	0	0	0	0
171	2017-01-02 04:25:00	0.1	80	13	0	0	0	0	0	0	0	0	0
172	2017-01-02 04:35:00	0	80	13	0	0	0	0	0	0	0	0	0
173	2017-01-02 04:45:00	0.1	80	13	0	0	0	0	0	0	0	0	0
174	2017-01-02 04:55:00	0.1	80	13	0	0	0	0	0	0	0	0	0
175	2017-01-02 05:05:00	0.1	80	13	0	0	0	0	0	0	0	0	0
176	2017-01-02 05:15:00	0.1	80	13	0	0	0	0	0	0	0	0	0
177	2017-01-02 05:25:00	0.1	80	13	0	0	0	0	0	0	0	0	0
178	2017-01-02 05:35:00	0.1	80	13	0	0	0	0	0	0	0	0	0
179	2017-01-02 05:45:00	0.2	80	13	0	0	0	0	0	0	0	0	0
180	2017-01-02 05:55:00	0.2	80	13	0	0	0	0	0	0	0	0	0
181	2017-01-02 06:05:00	0.2	80	13	0	0	0	0	0	0	0	0	0
182	2017-01-02 06:15:00	0.2	80	13	0	0	0	0	0	0	0	0	0
183	2017-01-02 06:25:00	0.2	80	13	0	0	0	0	0	0	0	0	0
184	2017-01-02 06:35:00	0.2	80	13	0	0	0	0	0	0	0	0	0
185	2017-01-02 06:45:00	0.2	80	13	0	0	0	0	0	0	0	0	0
186	2017-01-02 06:55:00	0.2	80	13	0	0	0	0	0	0	0	0	0
187	2017-01-02 07:05:00	0.3	80	13	0	0	0	0	0	0	0	0	0
188	2017-01-02 07:15:00	0.3	80	13	0	0	0	0	0	0	0	0	0
189	2017-01-02 07:25:00	0.4	80	13	0	0	0	0	0	0	0	0	0
190	2017-01-02 07:35:00	0.4	80	13	0	1	0	0	0	0	0	0	0
191	2017-01-02 07:45:00	0.5	80	13	0	2	0	0	0	0	0	0	1
192	2017-01-02 07:55:00	0.5	80	13	0	3	0	0	0	0	0	1	1
193	2017-01-02 08:05:00	0.5	80	13	0	4	0	0	1	0	0	1	1
194	2017-01-02 08:15:00	0.6	80	13	0	5	0	1	1	1	1	1	2
195	2017-01-02 08:25:00	0.6	80	13	0	6	1	1	1	1	1	1	2
196	2017-01-02 08:35:00	0.6	80	13	0	10	1	1	2	1	1	2	3
197	2017-01-02 08:45:00	0.6	80	13	0	12	1	1	2	1	1	3	4
198	2017-01-02 08:55:00	0.7	80	13	0	22	2	2	4	2	2	5	7
199	2017-01-02 09:05:00	0.8	80	13	0	30	3	3	5	3	3	7	10
200	2017-01-02 09:15:00	0.8	80	13	0	56	5	6	9	6	6	13	18
201	2017-01-02 09:25:00	0.8	80	13	0	36	3	4	6	4	4	8	12
202	2017-01-02 09:35:00	0.9	80	13	0	42	4	5	7	4	4	10	13
203	2017-01-02 09:45:00	0.9	80	13	0	67	6	7	11	7	7	15	21
204	2017-01-02 09:55:00	1	80	13	0	78	7	8	13	8	8	18	25
205	2017-01-02 10:05:00	1	80	13	0	81	7	9	13	8	8	18	26
206	2017-01-02 10:15:00	1.1	80	13	0	111	9	12	18	11	11	25	35
207	2017-01-02 10:25:00	1.2	80	13	0	146	12	16	23	15	15	33	46
208	2017-01-02 10:35:00	1.3	80	13	0	160	14	17	26	16	16	36	51
209	2017-01-02 10:45:00	1.3	80	13	0	131	11	14	21	13	13	30	42
210	2017-01-02 10:55:00	1.4	80	13	0	121	10	13	19	12	12	27	39
211	2017-01-02 11:05:00	1.5	80	13	0	117	10	12	19	12	12	26	37
212	2017-01-02 11:15:00	1.5	80	13	0	91	8	10	15	9	9	21	29
213	2017-01-02 11:25:00	1.4	80	13	0	81	7	9	13	8	8	18	26
214	2017-01-02 11:35:00	1.3	80	13	0	52	4	6	8	5	5	12	17
215	2017-01-02 11:45:00	1.6	80	13	0	137	12	15	22	14	14	31	44
216	2017-01-02 11:55:00	1.7	80	13	0	139	12	15	22	14	14	32	44
217	2017-01-02 12:05:00	1.9	80	13	0	158	13	17	25	16	16	36	50
218	2017-01-02 12:15:00	2	80	13	2.35	159	14	17	25	16	16	36	51
219	2017-01-02 12:25:00	1.8	80	13	0	131	11	14	21	13	13	30	42
220	2017-01-02 12:35:00	1.8	80	13	0	147	13	16	24	15	15	33	47
221	2017-01-02 12:45:00	1.9	80	13	0	146	12	16	23	15	15	33	47
222	2017-01-02 12:55:00	1.9	80	13	0	141	12	15	23	14	14	32	45
223	2017-01-02 13:05:00	2	80	13	0	134	11	14	21	13	14	30	43
224	2017-01-02 13:15:00	2	80	13	0	127	11	14	20	13	13	29	41
225	2017-01-02 13:25:00	1.8	80	13	0	121	10	13	19	12	12	27	38
226	2017-01-02 13:35:00	1.8	80	13	0	112	10	12	18	11	11	25	36
227	2017-01-02 13:45:00	1.9	80	13	0	104	9	11	17	10	11	24	33
228	2017-01-02 13:55:00	1.8	80	13	0	96	8	10	15	10	10	22	31
229	2017-01-02 14:05:00	1.8	80	13	0	85	7	9	14	9	9	19	27
230	2017-01-02 14:15:00	1.6	80	13	0	69	6	7	11	7	7	16	22
231	2017-01-02 14:25:00	1.4	80	13	0	54	5	6	9	5	6	12	17
232	2017-01-02 14:35:00	1.1	80	13	0	37	3	4	6	4	4	8	12
233	2017-01-02 14:45:00	1	80	13	0	31	3	3	5	3	3	7	10
234	2017-01-02 14:55:00	0.9	80	13	0	28	2	3	5	3	3	6	9
235	2017-01-02 15:05:00	0.8	80	13	0	23	2	2	4	2	2	5	7
236	2017-01-02 15:15:00	0.6	80	13	0	17	1	2	3	2	2	4	5
237	2017-01-02 15:25:00	0.4	80	13	0	11	1	1	2	1	1	2	3
238	2017-01-02 15:35:00	0.3	80	13	0	6	1	1	1	1	1	1	2
239	2017-01-02 15:45:00	0.1	80	13	0	3	0	0	0	0	0	1	1
240	2017-01-02 15:55:00	0.1	80	13	0	1	0	0	0	0	0	0	0
241	2017-01-02 16:05:00	0	80	13	0	0	0	0	0	0	0	0	0
242	2017-01-02 16:15:00	0	80	13	0	0	0	0	0	0	0	0	0
243	2017-01-02 16:25:00	0	80	13	0	0	0	0	0	0	0	0	0
244	2017-01-02 16:35:00	-0.3	80	13	0	0	0	0	0	0	0	0	0
245	2017-01-02 16:45:00	-0.6	80	13	0	0	0	0	0	0	0	0	0
246	2017-01-02 16:55:00	0	80	13	0	0	0	0	0	0	0	0	0
247	2017-01-02 17:05:00	0.4	80	13	0	0	0	0	0	0	0	0	0
248	2017-01-02 17:15:00	0.5	80	13	0	0	0	0	0	0	0	0	0
249	2017-01-02 17:25:00	0.4	80	13	0	0	0	0	0	0	0	0	0
250	2017-01-02 17:35:00	0.5	80	13	0	0	0	0	0	0	0	0	0
251	2017-01-02 17:45:00	0.4	80	13	0	0	0	0	0	0	0	0	0
252	2017-01-02 17:55:00	0.3	80	13	0	0	0	0	0	0	0	0	0
253	2017-01-02 18:05:00	0.3	80	13	0	0	0	0	0	0	0	0	0
254	2017-01-02 18:15:00	0.2	80	13	0	0	0	0	0	0	0	0	0
255	2017-01-02 18:25:00	0	80	13	0	0	0	0	0	0	0	0	0
256	2017-01-02 18:35:00	0	80	13	0	0	0	0	0	0	0	0	0
257	2017-01-02 18:45:00	-0.1	80	13	0	0	0	0	0	0	0	0	0
258	2017-01-02 18:55:00	-0.2	80	13	0	0	0	0	0	0	0	0	0
259	2017-01-02 19:05:00	-0.4	80	13	0	0	0	0	0	0	0	0	0
260	2017-01-02 19:15:00	-0.1	80	13	0	0	0	0	0	0	0	0	0
261	2017-01-02 19:25:00	-0.1	80	13	0	0	0	0	0	0	0	0	0
262	2017-01-02 19:35:00	0.1	80	13	0	0	0	0	0	0	0	0	0
263	2017-01-02 19:45:00	0.2	80	13	0	0	0	0	0	0	0	0	0
264	2017-01-02 19:55:00	0.5	80	13	0	0	0	0	0	0	0	0	0
265	2017-01-02 20:05:00	1.2	80	13	0	0	0	0	0	0	0	0	0
266	2017-01-02 20:15:00	1.5	80	13	0	0	0	0	0	0	0	0	0
267	2017-01-02 20:25:00	1.5	80	13	0	0	0	0	0	0	0	0	0
268	2017-01-02 20:35:00	1.5	80	13	0	0	0	0	0	0	0	0	0
269	2017-01-02 20:45:00	1.6	80	13	0	0	0	0	0	0	0	0	0
270	2017-01-02 20:55:00	1.6	80	13	0	0	0	0	0	0	0	0	0
271	2017-01-02 21:05:00	1.6	80	13	0	0	0	0	0	0	0	0	0
272	2017-01-02 21:15:00	1.3	80	13	0	0	0	0	0	0	0	0	0
273	2017-01-02 21:25:00	0.8	80	13	0	0	0	0	0	0	0	0	0
274	2017-01-02 21:35:00	0.8	80	13	0	0	0	0	0	0	0	0	0
275	2017-01-02 21:45:00	0.8	80	13	0	0	0	0	0	0	0	0	0
276	2017-01-02 21:55:00	1.2	80	13	0	0	0	0	0	0	0	0	0
277	2017-01-02 22:05:00	1.2	80	13	0	0	0	0	0	0	0	0	0
278	2017-01-02 22:15:00	1.4	80	13	0	0	0	0	0	0	0	0	0
279	2017-01-02 22:25:00	1.5	80	13	0	0	0	0	0	0	0	0	0
280	2017-01-02 22:35:00	1.7	80	13	0	0	0	0	0	0	0	0	0
281	2017-01-02 22:45:00	1.7	80	13	0	0	0	0	0	0	0	0	0
282	2017-01-02 22:55:00	1.7	80	13	0	0	0	0	0	0	0	0	0
283	2017-01-02 23:05:00	1.6	80	13	0	0	0	0	0	0	0	0	0
284	2017-01-02 23:15:00	1.6	80	13	0	0	0	0	0	0	0	0	0
285	2017-01-02 23:25:00	1.5	80	13	0	0	0	0	0	0	0	0	0
286	2017-01-02 23:35:00	1.5	80	13	0	0	0	0	0	0	0	0	0
287	2017-01-02 23:45:00	1.5	80	13	0	0	0	0	0	0	0	0	0
288	2017-01-02 23:55:00	1.5	80	13	0	0	0	0	0	0	0	0	0
289	2017-01-03 00:05:00	1.4	80	13	0	0	0	0	0	0	0	0	0
290	2017-01-03 00:15:00	1.3	80	13	0	0	0	0	0	0	0	0	0
291	2017-01-03 00:25:00	1.2	80	13	0	0	0	0	0	0	0	0	0
292	2017-01-03 00:35:00	1.3	80	13	0	0	0	0	0	0	0	0	0
293	2017-01-03 00:45:00	1.6	80	13	0	0	0	0	0	0	0	0	0
294	2017-01-03 00:55:00	1.7	80	13	0	0	0	0	0	0	0	0	0
295	2017-01-03 01:05:00	1.8	80	13	0	0	0	0	0	0	0	0	0
296	2017-01-03 01:15:00	1.8	80	13	0	0	0	0	0	0	0	0	0
297	2017-01-03 01:25:00	1.5	80	13	0	0	0	0	0	0	0	0	0
298	2017-01-03 01:35:00	1.1	80	13	0	0	0	0	0	0	0	0	0
299	2017-01-03 01:45:00	1.2	80	13	0	0	0	0	0	0	0	0	0
300	2017-01-03 01:55:00	1.6	80	13	0	0	0	0	0	0	0	0	0
301	2017-01-03 02:05:00	1.3	80	13	0	0	0	0	0	0	0	0	0
302	2017-01-03 02:15:00	1.5	80	13	0	0	0	0	0	0	0	0	0
303	2017-01-03 02:25:00	1.4	80	13	0	0	0	0	0	0	0	0	0
304	2017-01-03 02:35:00	1.4	80	13	0	0	0	0	0	0	0	0	0
305	2017-01-03 02:45:00	1.3	80	13	0	0	0	0	0	0	0	0	0
306	2017-01-03 02:55:00	1.4	80	13	0	0	0	0	0	0	0	0	0
307	2017-01-03 03:05:00	1.4	80	13	0	0	0	0	0	0	0	0	0
308	2017-01-03 03:15:00	1.3	80	13	0	0	0	0	0	0	0	0	0
309	2017-01-03 03:25:00	1.3	80	13	0	0	0	0	0	0	0	0	0
310	2017-01-03 03:35:00	1.2	80	13	0	0	0	0	0	0	0	0	0
311	2017-01-03 03:45:00	1.6	80	13	0	0	0	0	0	0	0	0	0
312	2017-01-03 03:55:00	1.7	80	13	0	0	0	0	0	0	0	0	0
313	2017-01-03 04:05:00	1.8	80	13	0	0	0	0	0	0	0	0	0
314	2017-01-03 04:15:00	1.8	80	13	0	0	0	0	0	0	0	0	0
315	2017-01-03 04:25:00	1.8	80	13	0	0	0	0	0	0	0	0	0
316	2017-01-03 04:35:00	1.9	80	13	0	0	0	0	0	0	0	0	0
317	2017-01-03 04:45:00	1.8	80	13	0	0	0	0	0	0	0	0	0
318	2017-01-03 04:55:00	1.8	80	13	0	0	0	0	0	0	0	0	0
319	2017-01-03 05:05:00	1.9	80	13	0	0	0	0	0	0	0	0	0
320	2017-01-03 05:15:00	2	80	13	0	0	0	0	0	0	0	0	0
321	2017-01-03 05:25:00	1.9	80	13	0	0	0	0	0	0	0	0	0
322	2017-01-03 05:35:00	1.9	80	13	0	0	0	0	0	0	0	0	0
323	2017-01-03 05:45:00	1.9	80	13	0	0	0	0	0	0	0	0	0
324	2017-01-03 05:55:00	1.9	80	13	0	0	0	0	0	0	0	0	0
325	2017-01-03 06:05:00	1.8	80	13	0	0	0	0	0	0	0	0	0
326	2017-01-03 06:15:00	1.8	80	13	0	0	0	0	0	0	0	0	0
327	2017-01-03 06:25:00	1.8	80	13	0	0	0	0	0	0	0	0	0
328	2017-01-03 06:35:00	1.9	80	13	0	0	0	0	0	0	0	0	0
329	2017-01-03 06:45:00	1.9	80	13	0	0	0	0	0	0	0	0	0
330	2017-01-03 06:55:00	1.9	80	13	0	0	0	0	0	0	0	0	0
331	2017-01-03 07:05:00	1.9	80	13	0	0	0	0	0	0	0	0	0
332	2017-01-03 07:15:00	1.9	80	13	0	0	0	0	0	0	0	0	0
333	2017-01-03 07:25:00	2	80	13	0	1	0	0	0	0	0	0	0
334	2017-01-03 07:35:00	2	80	13	0	2	0	0	0	0	0	0	1
335	2017-01-03 07:45:00	1.9	80	13	0	4	0	0	1	0	0	1	1
336	2017-01-03 07:55:00	1.9	80	13	0	8	1	1	1	1	1	2	3
337	2017-01-03 08:05:00	1.9	80	13	0	15	1	2	2	1	2	3	5
338	2017-01-03 08:15:00	1.9	80	13	0	22	2	2	3	2	2	5	7
339	2017-01-03 08:25:00	1.9	80	13	0	24	2	3	4	2	2	5	8
340	2017-01-03 08:35:00	2	80	13	0	23	2	2	4	2	2	5	7
341	2017-01-03 08:45:00	2.1	80	13	0	23	2	2	4	2	2	5	7
342	2017-01-03 08:55:00	2.1	80	13	0	30	3	3	5	3	3	7	9
343	2017-01-03 09:05:00	2	80	13	0	40	3	4	6	4	4	9	13
344	2017-01-03 09:15:00	2.1	80	13	0	57	5	6	9	6	6	13	18
345	2017-01-03 09:25:00	2.2	80	13	0	82	7	9	13	8	8	19	26
346	2017-01-03 09:35:00	2.2	80	13	0	66	6	7	11	7	7	15	21
347	2017-01-03 09:45:00	2.2	80	13	0	65	6	7	10	6	7	15	21
348	2017-01-03 09:55:00	2.3	80	13	0	87	7	9	14	9	9	20	28
349	2017-01-03 10:05:00	2.3	80	13	0	81	7	9	13	8	8	18	26
350	2017-01-03 10:15:00	2.4	80	13	0	68	6	7	11	7	7	15	22
351	2017-01-03 10:25:00	2.3	80	13	0	64	5	7	10	6	7	14	20
352	2017-01-03 10:35:00	2.2	80	13	0	49	4	5	8	5	5	11	16
353	2017-01-03 10:45:00	2.2	80	13	0	92	8	10	15	9	9	21	29
354	2017-01-03 10:55:00	2.3	80	13	0	95	8	10	15	9	10	21	30
355	2017-01-03 11:05:00	2.3	80	13	0	82	7	9	13	8	8	19	26
356	2017-01-03 11:15:00	2.2	80	13	0	108	9	11	17	11	11	24	34
357	2017-01-03 11:25:00	2.2	80	13	0	98	8	10	16	10	10	22	31
358	2017-01-03 11:35:00	2.2	80	13	0	104	9	11	17	10	11	23	33
359	2017-01-03 11:45:00	2.3	80	13	0	128	11	14	21	13	13	29	41
360	2017-01-03 11:55:00	2.4	80	13	0	133	11	14	21	13	14	30	42
361	2017-01-03 12:05:00	2.2	80	13	0	106	9	11	17	11	11	24	34
362	2017-01-03 12:15:00	2.3	80	13	0	121	10	13	19	12	12	27	39
363	2017-01-03 12:25:00	2.4	80	13	0	163	14	17	26	16	17	37	52
364	2017-01-03 12:35:00	2.4	80	13	0	157	13	17	25	16	16	36	50
365	2017-01-03 12:45:00	2.4	80	13	0	142	12	15	23	14	15	32	45
366	2017-01-03 12:55:00	2.7	80	13	0	204	17	22	33	20	21	46	65
367	2017-01-03 13:05:00	2.7	78.4	13	0	173	15	18	28	17	18	39	55
368	2017-01-03 13:15:00	2.6	77.6	13	0	151	13	16	24	15	16	34	48
369	2017-01-03 13:25:00	2.7	77.4	13	0	144	12	15	23	14	15	33	46
370	2017-01-03 13:35:00	2.7	77.6	13	0	134	11	14	21	13	14	30	43
371	2017-01-03 13:45:00	2.8	76.6	13	0	127	11	14	20	13	13	29	41
372	2017-01-03 13:55:00	2.6	77	13	0	63	5	7	10	6	6	14	20
373	2017-01-03 14:05:00	2.4	78.3	13	0	36	3	4	6	4	4	8	11
374	2017-01-03 14:15:00	2.4	78.8	13	0	28	2	3	4	3	3	6	9
375	2017-01-03 14:25:00	2.3	79.3	13	0	22	2	2	4	2	2	5	7
376	2017-01-03 14:35:00	2.3	80	13	0	18	1	2	3	2	2	4	6
377	2017-01-03 14:45:00	2.2	80	13	0	13	1	1	2	1	1	3	4
378	2017-01-03 14:55:00	2.3	80	13	0	9	1	1	2	1	1	2	3
379	2017-01-03 15:05:00	2.2	80	13	0	9	1	1	1	1	1	2	3
380	2017-01-03 15:15:00	2.3	80	13	0	8	1	1	1	1	1	2	3
381	2017-01-03 15:25:00	2.3	80	13	0	5	0	1	1	0	1	1	2
382	2017-01-03 15:35:00	2.3	80	13	0	3	0	0	0	0	0	1	1
383	2017-01-03 15:45:00	2.4	80	13	0	1	0	0	0	0	0	0	0
384	2017-01-03 15:55:00	2.5	80	13	0	0	0	0	0	0	0	0	0
385	2017-01-03 16:05:00	2.8	80	13	0	0	0	0	0	0	0	0	0
386	2017-01-03 16:15:00	2.7	80	13	0	0	0	0	0	0	0	0	0
387	2017-01-03 16:25:00	2.7	80	13	0	0	0	0	0	0	0	0	0
388	2017-01-03 16:35:00	2.8	80	13	0	0	0	0	0	0	0	0	0
389	2017-01-03 16:45:00	2.9	80	13	0	0	0	0	0	0	0	0	0
390	2017-01-03 16:55:00	3.2	80	13	0	0	0	0	0	0	0	0	0
391	2017-01-03 17:05:00	3.2	80	13	0	0	0	0	0	0	0	0	0
392	2017-01-03 17:15:00	3.2	80	13	0	0	0	0	0	0	0	0	0
393	2017-01-03 17:25:00	3.1	80	13	0	0	0	0	0	0	0	0	0
394	2017-01-03 17:35:00	3	80	13	0	0	0	0	0	0	0	0	0
395	2017-01-03 17:45:00	3	80	13	0	0	0	0	0	0	0	0	0
396	2017-01-03 17:55:00	3.1	80	13	0	0	0	0	0	0	0	0	0
397	2017-01-03 18:05:00	3.1	80	13	0	0	0	0	0	0	0	0	0
398	2017-01-03 18:15:00	3	80	13	0	0	0	0	0	0	0	0	0
399	2017-01-03 18:25:00	3	80	13	0	0	0	0	0	0	0	0	0
400	2017-01-03 18:35:00	3.1	80	13	0	0	0	0	0	0	0	0	0
401	2017-01-03 18:45:00	3	80	13	0	0	0	0	0	0	0	0	0
402	2017-01-03 18:55:00	3.2	80	13	0	0	0	0	0	0	0	0	0
403	2017-01-03 19:05:00	3.2	80	13	0	0	0	0	0	0	0	0	0
404	2017-01-03 19:15:00	3.1	80	13	0	0	0	0	0	0	0	0	0
405	2017-01-03 19:25:00	3.2	80	13	0	0	0	0	0	0	0	0	0
406	2017-01-03 19:35:00	3.1	80	13	0	0	0	0	0	0	0	0	0
407	2017-01-03 19:45:00	3.1	80	13	0	0	0	0	0	0	0	0	0
408	2017-01-03 19:55:00	3.2	80	13	0	0	0	0	0	0	0	0	0
409	2017-01-03 20:05:00	3.3	80	13	0	0	0	0	0	0	0	0	0
410	2017-01-03 20:15:00	3.3	80	13	0	0	0	0	0	0	0	0	0
411	2017-01-03 20:25:00	3.4	80	13	0	0	0	0	0	0	0	0	0
412	2017-01-03 20:35:00	3.5	80	13	0	0	0	0	0	0	0	0	0
413	2017-01-03 20:45:00	3.5	80	13	0	0	0	0	0	0	0	0	0
414	2017-01-03 20:55:00	3.5	80	13	0	0	0	0	0	0	0	0	0
415	2017-01-03 21:05:00	3.4	80	13	0	0	0	0	0	0	0	0	0
416	2017-01-03 21:15:00	3.5	80	13	0	0	0	0	0	0	0	0	0
417	2017-01-03 21:25:00	3.5	80	13	0	0	0	0	0	0	0	0	0
418	2017-01-03 21:35:00	3.5	80	13	0	0	0	0	0	0	0	0	0
419	2017-01-03 21:45:00	3.4	80	13	0	0	0	0	0	0	0	0	0
420	2017-01-03 21:55:00	3.5	80	13	0	0	0	0	0	0	0	0	0
421	2017-01-03 22:05:00	3.4	80	13	0	0	0	0	0	0	0	0	0
422	2017-01-03 22:15:00	3.4	80	13	0	0	0	0	0	0	0	0	0
423	2017-01-03 22:25:00	3.3	80	13	0	0	0	0	0	0	0	0	0
424	2017-01-03 22:35:00	3.4	80	13	0	0	0	0	0	0	0	0	0
425	2017-01-03 22:45:00	3.4	80	13	0	0	0	0	0	0	0	0	0
426	2017-01-03 22:55:00	3.4	80	13	0	0	0	0	0	0	0	0	0
427	2017-01-03 23:05:00	3.4	80	13	0	0	0	0	0	0	0	0	0
428	2017-01-03 23:15:00	3.5	80	13	0	0	0	0	0	0	0	0	0
429	2017-01-03 23:25:00	3.5	80	13	0	0	0	0	0	0	0	0	0
430	2017-01-03 23:35:00	3.4	80	13	0	0	0	0	0	0	0	0	0
431	2017-01-03 23:45:00	3.4	80	13	0	0	0	0	0	0	0	0	0
432	2017-01-03 23:55:00	3.2	80	13	0	0	0	0	0	0	0	0	0
433	2017-01-04 00:05:00	3.1	80	13	0	0	0	0	0	0	0	0	0
434	2017-01-04 00:15:00	3	80	13	0	0	0	0	0	0	0	0	0
435	2017-01-04 00:25:00	3	80	13	0	0	0	0	0	0	0	0	0
436	2017-01-04 00:35:00	3	80	13	0	0	0	0	0	0	0	0	0
437	2017-01-04 00:45:00	3.1	80	13	0	0	0	0	0	0	0	0	0
438	2017-01-04 00:55:00	3.1	80	13	0	0	0	0	0	0	0	0	0
439	2017-01-04 01:05:00	3.2	80	13	0	0	0	0	0	0	0	0	0
440	2017-01-04 01:15:00	3.2	80	13	0	0	0	0	0	0	0	0	0
441	2017-01-04 01:25:00	3.3	80	13	0	0	0	0	0	0	0	0	0
442	2017-01-04 01:35:00	3.3	80	13	0	0	0	0	0	0	0	0	0
443	2017-01-04 01:45:00	3.1	80	13	0	0	0	0	0	0	0	0	0
444	2017-01-04 01:55:00	3.1	80	13	0	0	0	0	0	0	0	0	0
445	2017-01-04 02:05:00	3.2	80	13	0	0	0	0	0	0	0	0	0
446	2017-01-04 02:15:00	3.2	80	13	0	0	0	0	0	0	0	0	0
447	2017-01-04 02:25:00	3.3	80	13	0	0	0	0	0	0	0	0	0
448	2017-01-04 02:35:00	3.3	80	13	0	0	0	0	0	0	0	0	0
449	2017-01-04 02:45:00	3.4	80	13	0	0	0	0	0	0	0	0	0
450	2017-01-04 02:55:00	3.4	80	13	0	0	0	0	0	0	0	0	0
451	2017-01-04 03:05:00	3.4	80	13	0	0	0	0	0	0	0	0	0
452	2017-01-04 03:15:00	3.3	80	13	0	0	0	0	0	0	0	0	0
453	2017-01-04 03:25:00	3.3	80	13	0	0	0	0	0	0	0	0	0
454	2017-01-04 03:35:00	3.3	80	13	0	0	0	0	0	0	0	0	0
455	2017-01-04 03:45:00	3.4	80	13	0	0	0	0	0	0	0	0	0
456	2017-01-04 03:55:00	3.4	80	13	0	0	0	0	0	0	0	0	0
457	2017-01-04 04:05:00	3.4	80	13	0	0	0	0	0	0	0	0	0
458	2017-01-04 04:15:00	3.4	80	13	0	0	0	0	0	0	0	0	0
459	2017-01-04 04:25:00	3.4	80	13	0	0	0	0	0	0	0	0	0
460	2017-01-04 04:35:00	3.4	80	13	0	0	0	0	0	0	0	0	0
461	2017-01-04 04:45:00	3.4	80	13	0	0	0	0	0	0	0	0	0
462	2017-01-04 04:55:00	3.4	80	13	0	0	0	0	0	0	0	0	0
463	2017-01-04 05:05:00	3.4	80	13	0	0	0	0	0	0	0	0	0
464	2017-01-04 05:15:00	3.4	80	13	0	0	0	0	0	0	0	0	0
465	2017-01-04 05:25:00	3.4	80	13	0	0	0	0	0	0	0	0	0
466	2017-01-04 05:35:00	3.5	80	13	0	0	0	0	0	0	0	0	0
467	2017-01-04 05:45:00	3.5	80	13	0	0	0	0	0	0	0	0	0
468	2017-01-04 05:55:00	3.4	80	13	0	0	0	0	0	0	0	0	0
469	2017-01-04 06:05:00	3.5	80	13	0	0	0	0	0	0	0	0	0
470	2017-01-04 06:15:00	3.5	80	13	0	0	0	0	0	0	0	0	0
471	2017-01-04 06:25:00	3.5	80	13	0	0	0	0	0	0	0	0	0
472	2017-01-04 06:35:00	3.5	80	13	0	0	0	0	0	0	0	0	0
473	2017-01-04 06:45:00	3.5	80	13	0	0	0	0	0	0	0	0	0
474	2017-01-04 06:55:00	3.6	80	13	0	0	0	0	0	0	0	0	0
475	2017-01-04 07:05:00	3.5	80	13	0	0	0	0	0	0	0	0	0
476	2017-01-04 07:15:00	3.5	80	13	0	0	0	0	0	0	0	0	0
477	2017-01-04 07:25:00	3.6	80	13	0	0	0	0	0	0	0	0	0
478	2017-01-04 07:35:00	3.6	80	13	0	1	0	0	0	0	0	0	0
479	2017-01-04 07:45:00	3.6	80	13	0	2	0	0	0	0	0	0	0
480	2017-01-04 07:55:00	3.6	80	13	0	2	0	0	0	0	0	0	1
481	2017-01-04 08:05:00	3.6	80	13	0	5	0	1	1	1	1	1	2
482	2017-01-04 08:15:00	3.6	80	13	0	7	1	1	1	1	1	2	2
483	2017-01-04 08:25:00	3.8	80	13	0	8	1	1	1	1	1	2	3
484	2017-01-04 08:35:00	3.9	80	13	0	13	1	1	2	1	1	3	4
485	2017-01-04 08:45:00	4.1	80	13	0	20	2	2	3	2	2	4	6
486	2017-01-04 08:55:00	4.3	80	13	0	25	2	3	4	2	3	6	8
487	2017-01-04 09:05:00	4.4	80	13	0	36	3	4	6	4	4	8	11
488	2017-01-04 09:15:00	4.6	80	13	0	32	3	3	5	3	3	7	10
489	2017-01-04 09:25:00	4.7	80	13	0	40	3	4	6	4	4	9	13
490	2017-01-04 09:35:00	4.8	80	13	0	66	6	7	11	7	7	15	21
491	2017-01-04 09:45:00	4.9	80	13	0	75	6	8	12	8	8	17	24
492	2017-01-04 09:55:00	5	80	13	0	80	7	9	13	8	8	18	26
493	2017-01-04 10:05:00	5.2	80	13	0	109	9	12	17	11	11	25	35
494	2017-01-04 10:15:00	5.3	80	13	0	90	8	10	14	9	9	20	29
495	2017-01-04 10:25:00	5.4	80	13	0	88	8	9	14	9	9	20	28
496	2017-01-04 10:35:00	5.5	80	13	0	103	9	11	17	10	11	23	33
497	2017-01-04 10:45:00	5.5	80	13	0	86	7	9	14	9	9	19	27
498	2017-01-04 10:55:00	5.4	80	13	0	52	4	6	8	5	5	12	16
499	2017-01-04 11:05:00	5.4	80	13	0	53	5	6	9	5	5	12	17
500	2017-01-04 11:15:00	5.3	80	13	0	81	7	9	13	8	8	18	26
501	2017-01-04 11:25:00	5.2	80	13	0	129	11	14	21	13	13	29	41
502	2017-01-04 11:35:00	5	80	13	0	56	5	6	9	6	6	13	18
503	2017-01-04 11:45:00	5	80	13	0	74	6	8	12	7	8	17	24
504	2017-01-04 11:55:00	5	80	13	0	73	6	8	12	7	7	17	23
505	2017-01-04 12:05:00	5	80	13	0	61	5	7	10	6	6	14	20
506	2017-01-04 12:15:00	5	80	13	0	67	6	7	11	7	7	15	21
507	2017-01-04 12:25:00	5	80	13	0	51	4	5	8	5	5	12	16
508	2017-01-04 12:35:00	4.9	80	13	0	51	4	5	8	5	5	12	16
509	2017-01-04 12:45:00	5.1	79.9	13	0	92	8	10	15	9	9	21	29
510	2017-01-04 12:55:00	5.5	77	13	0	127	11	14	20	13	13	29	41
511	2017-01-04 13:05:00	5.3	76.7	13	0	50	4	5	8	5	5	11	16
512	2017-01-04 13:15:00	5.2	77.1	13	0	57	5	6	9	6	6	13	18
513	2017-01-04 13:25:00	5.4	77.8	13	0	92	8	10	15	9	9	21	29
514	2017-01-04 13:35:00	5.2	77.3	13	0	40	3	4	6	4	4	9	13
515	2017-01-04 13:45:00	5.1	78.5	13	0	30	3	3	5	3	3	7	10
516	2017-01-04 13:55:00	5	79.2	13	0	47	4	5	8	5	5	11	15
517	2017-01-04 14:05:00	5.2	78.1	13	0	57	5	6	9	6	6	13	18
518	2017-01-04 14:15:00	5.1	78.9	13	0	42	4	4	7	4	4	9	13
519	2017-01-04 14:25:00	5	78.6	13	0	58	5	6	9	6	6	13	19
520	2017-01-04 14:35:00	5	76.9	13	0	31	3	3	5	3	3	7	10
521	2017-01-04 14:45:00	4.9	78.1	13	0	19	2	2	3	2	2	4	6
522	2017-01-04 14:55:00	4.9	76.8	13	0	17	1	2	3	2	2	4	5
523	2017-01-04 15:05:00	4.9	77.1	13	0	12	1	1	2	1	1	3	4
524	2017-01-04 15:15:00	4.9	76.2	13	0	10	1	1	2	1	1	2	3
525	2017-01-04 15:25:00	4.9	76.6	13	0	8	1	1	1	1	1	2	3
526	2017-01-04 15:35:00	4.6	77.7	13	0	2	0	0	0	0	0	0	1
527	2017-01-04 15:45:00	4.6	76.8	13	0	1	0	0	0	0	0	0	0
528	2017-01-04 15:55:00	4.3	79.3	13	0	1	0	0	0	0	0	0	0
529	2017-01-04 16:05:00	3.9	80	13	0	0	0	0	0	0	0	0	0
530	2017-01-04 16:15:00	3.9	80	13	0	0	0	0	0	0	0	0	0
531	2017-01-04 16:25:00	4.1	80	13	0	0	0	0	0	0	0	0	0
532	2017-01-04 16:35:00	4.1	79.9	13	0	0	0	0	0	0	0	0	0
533	2017-01-04 16:45:00	4.1	80	13	0	0	0	0	0	0	0	0	0
534	2017-01-04 16:55:00	4	80	13	0	0	0	0	0	0	0	0	0
535	2017-01-04 17:05:00	3.7	80	13	0	0	0	0	0	0	0	0	0
536	2017-01-04 17:15:00	3.5	80	13	0	0	0	0	0	0	0	0	0
537	2017-01-04 17:25:00	3.4	80	13	0	0	0	0	0	0	0	0	0
538	2017-01-04 17:35:00	3.5	80	13	0	0	0	0	0	0	0	0	0
539	2017-01-04 17:45:00	3.6	80	13	0	0	0	0	0	0	0	0	0
540	2017-01-04 17:55:00	3.6	80	13	0	0	0	0	0	0	0	0	0
541	2017-01-04 18:05:00	3.8	80	13	0	0	0	0	0	0	0	0	0
542	2017-01-04 18:15:00	3.7	80	13	0	0	0	0	0	0	0	0	0
543	2017-01-04 18:25:00	3.6	80	13	0	0	0	0	0	0	0	0	0
544	2017-01-04 18:35:00	3.6	80	13	0	0	0	0	0	0	0	0	0
545	2017-01-04 18:45:00	3.5	80	13	0	0	0	0	0	0	0	0	0
546	2017-01-04 18:55:00	3.4	80	13	0	0	0	0	0	0	0	0	0
547	2017-01-04 19:05:00	3.4	80	13	0	0	0	0	0	0	0	0	0
548	2017-01-04 19:15:00	3.4	80	13	0	0	0	0	0	0	0	0	0
549	2017-01-04 19:25:00	3.4	80	13	0	0	0	0	0	0	0	0	0
550	2017-01-04 19:35:00	3.3	80	13	0	0	0	0	0	0	0	0	0
551	2017-01-04 19:45:00	3	80	13	0	0	0	0	0	0	0	0	0
552	2017-01-04 19:55:00	2.8	80	13	0	0	0	0	0	0	0	0	0
553	2017-01-04 20:05:00	2.6	80	13	0	0	0	0	0	0	0	0	0
554	2017-01-04 20:15:00	2.4	80	13	0	0	0	0	0	0	0	0	0
555	2017-01-04 20:25:00	2.4	80	13	0	0	0	0	0	0	0	0	0
556	2017-01-04 20:35:00	2.3	80	13	0	0	0	0	0	0	0	0	0
557	2017-01-04 20:45:00	2.1	80	13	0	0	0	0	0	0	0	0	0
558	2017-01-04 20:55:00	2	80	13	0	0	0	0	0	0	0	0	0
559	2017-01-04 21:05:00	2	80	13	0	0	0	0	0	0	0	0	0
560	2017-01-04 21:15:00	2.1	80	13	0	0	0	0	0	0	0	0	0
561	2017-01-04 21:25:00	2	80	13	0	0	0	0	0	0	0	0	0
562	2017-01-04 21:35:00	1.9	80	13	0	0	0	0	0	0	0	0	0
563	2017-01-04 21:45:00	1.9	80	13	0	0	0	0	0	0	0	0	0
564	2017-01-04 21:55:00	1.9	80	13	0	0	0	0	0	0	0	0	0
565	2017-01-04 22:05:00	2	80	13	0	0	0	0	0	0	0	0	0
566	2017-01-04 22:15:00	1.9	80	13	0	0	0	0	0	0	0	0	0
567	2017-01-04 22:25:00	1.8	80	13	0	0	0	0	0	0	0	0	0
568	2017-01-04 22:35:00	1.5	80	13	0	0	0	0	0	0	0	0	0
569	2017-01-04 22:45:00	1.3	80	13	0	0	0	0	0	0	0	0	0
570	2017-01-04 22:55:00	1.3	80	13	0	0	0	0	0	0	0	0	0
571	2017-01-04 23:05:00	1.2	80	13	0	0	0	0	0	0	0	0	0
572	2017-01-04 23:15:00	1.2	80	13	0	0	0	0	0	0	0	0	0
573	2017-01-04 23:25:00	1.3	80	13	0	0	0	0	0	0	0	0	0
574	2017-01-04 23:35:00	1.3	80	13	0	0	0	0	0	0	0	0	0
575	2017-01-04 23:45:00	0.8	80	13	0	0	0	0	0	0	0	0	0
576	2017-01-04 23:55:00	0.7	80	13	0	0	0	0	0	0	0	0	0
577	2017-01-05 00:05:00	0.6	80	13	0	0	0	0	0	0	0	0	0
578	2017-01-05 00:15:00	0.5	80	13	0	0	0	0	0	0	0	0	0
579	2017-01-05 00:25:00	0.5	80	13	0	0	0	0	0	0	0	0	0
580	2017-01-05 00:35:00	0.6	80	13	0	0	0	0	0	0	0	0	0
581	2017-01-05 00:45:00	0.6	80	13	0	0	0	0	0	0	0	0	0
582	2017-01-05 00:55:00	0.9	80	13	0	0	0	0	0	0	0	0	0
583	2017-01-05 01:05:00	1.1	80	13	0	0	0	0	0	0	0	0	0
584	2017-01-05 01:15:00	1.1	80	13	0	0	0	0	0	0	0	0	0
585	2017-01-05 01:25:00	1.2	80	13	0	0	0	0	0	0	0	0	0
586	2017-01-05 01:35:00	1.1	80	13	0	0	0	0	0	0	0	0	0
587	2017-01-05 01:45:00	1.1	80	13	0	0	0	0	0	0	0	0	0
588	2017-01-05 01:55:00	1.2	80	13	0	0	0	0	0	0	0	0	0
589	2017-01-05 02:05:00	1	80	13	0	0	0	0	0	0	0	0	0
590	2017-01-05 02:15:00	0.7	80	13	0	0	0	0	0	0	0	0	0
591	2017-01-05 02:25:00	0.6	80	13	0	0	0	0	0	0	0	0	0
592	2017-01-05 02:35:00	0.6	80	13	0	0	0	0	0	0	0	0	0
593	2017-01-05 02:45:00	0.4	80	13	0	0	0	0	0	0	0	0	0
594	2017-01-05 02:55:00	0.4	80	13	0	0	0	0	0	0	0	0	0
595	2017-01-05 03:05:00	0.7	80	13	0	0	0	0	0	0	0	0	0
596	2017-01-05 03:15:00	0.7	80	13	0	0	0	0	0	0	0	0	0
597	2017-01-05 03:25:00	0.8	80	13	0	0	0	0	0	0	0	0	0
598	2017-01-05 03:35:00	0.8	80	13	0	0	0	0	0	0	0	0	0
599	2017-01-05 03:45:00	0.9	80	13	0	0	0	0	0	0	0	0	0
600	2017-01-05 03:55:00	0.9	80	13	0	0	0	0	0	0	0	0	0
601	2017-01-05 04:05:00	1	80	13	0	0	0	0	0	0	0	0	0
602	2017-01-05 04:15:00	1.1	80	13	0	0	0	0	0	0	0	0	0
603	2017-01-05 04:25:00	1.1	80	13	0	0	0	0	0	0	0	0	0
604	2017-01-05 04:35:00	1.1	80	13	0	0	0	0	0	0	0	0	0
605	2017-01-05 04:45:00	1.1	80	13	0	0	0	0	0	0	0	0	0
606	2017-01-05 04:55:00	1	80	13	0	0	0	0	0	0	0	0	0
607	2017-01-05 05:05:00	0.8	80	13	0	0	0	0	0	0	0	0	0
608	2017-01-05 05:15:00	0.7	80	13	0	0	0	0	0	0	0	0	0
609	2017-01-05 05:25:00	0.7	80	13	0	0	0	0	0	0	0	0	0
610	2017-01-05 05:35:00	0.7	80	13	0	0	0	0	0	0	0	0	0
611	2017-01-05 05:45:00	0.7	80	13	0	0	0	0	0	0	0	0	0
612	2017-01-05 05:55:00	0.5	80	13	0	0	0	0	0	0	0	0	0
613	2017-01-05 06:05:00	0.5	80	13	0	0	0	0	0	0	0	0	0
614	2017-01-05 06:15:00	0.6	80	13	0	0	0	0	0	0	0	0	0
615	2017-01-05 06:25:00	0.8	80	13	0	0	0	0	0	0	0	0	0
616	2017-01-05 06:35:00	0.8	80	13	0	0	0	0	0	0	0	0	0
617	2017-01-05 06:45:00	0.7	80	13	0	0	0	0	0	0	0	0	0
618	2017-01-05 06:55:00	0.6	80	13	0	0	0	0	0	0	0	0	0
619	2017-01-05 07:05:00	0.5	80	13	0	0	0	0	0	0	0	0	0
620	2017-01-05 07:15:00	0.5	80	13	0	0	0	0	0	0	0	0	0
621	2017-01-05 07:25:00	0.4	80	13	0	1	0	0	0	0	0	0	0
622	2017-01-05 07:35:00	0.3	80	13	0	3	0	0	1	0	0	1	1
623	2017-01-05 07:45:00	0.2	80	13	0	7	1	1	1	1	1	2	2
624	2017-01-05 07:55:00	0.1	80	13	0	13	1	1	2	1	1	3	4
625	2017-01-05 08:05:00	0.2	80	13	0	24	2	3	4	2	2	6	8
626	2017-01-05 08:15:00	0.4	80	13	0	33	3	3	5	3	3	7	10
627	2017-01-05 08:25:00	0.4	80	13	0	40	3	4	6	4	4	9	13
628	2017-01-05 08:35:00	0.5	80	13	0	54	5	6	9	5	6	12	17
629	2017-01-05 08:45:00	0.7	80	13	0	64	5	7	10	6	7	14	20
630	2017-01-05 08:55:00	0.7	80	13	0	76	6	8	12	8	8	17	24
631	2017-01-05 09:05:00	0.8	80	13	0	90	8	10	14	9	9	20	29
632	2017-01-05 09:15:00	0.8	80	13	0	98	8	10	16	10	10	22	31
633	2017-01-05 09:25:00	0.9	80	13	0	117	10	13	19	12	12	27	37
634	2017-01-05 09:35:00	1.1	80	13	0	125	11	13	20	12	13	28	40
635	2017-01-05 09:45:00	1	80	13	0	136	12	15	22	14	14	31	43
636	2017-01-05 09:55:00	1.1	80	13	0	146	12	16	24	15	15	33	47
637	2017-01-05 10:05:00	1.2	80	13	0	155	13	17	25	15	16	35	49
638	2017-01-05 10:15:00	1.4	80	13	0	162	14	17	26	16	17	37	52
639	2017-01-05 10:25:00	1.6	80	13	0	169	14	18	27	17	17	38	54
640	2017-01-05 10:35:00	1.8	78.4	13	0	177	15	19	28	18	18	40	56
641	2017-01-05 10:45:00	1.8	75.2	13	0	180	15	19	29	18	18	41	57
642	2017-01-05 10:55:00	1.9	74.9	13	0	192	16	20	31	19	20	43	61
643	2017-01-05 11:05:00	2	72.7	13	0	194	17	21	31	19	20	44	62
644	2017-01-05 11:15:00	2	73.7	13	0	203	17	22	33	20	21	46	65
645	2017-01-05 11:25:00	2	70.3	13	0	202	17	22	32	20	21	46	64
646	2017-01-05 11:35:00	1.9	69.4	13	0	208	18	22	33	21	21	47	66
647	2017-01-05 11:45:00	1.9	69.8	13	0	217	19	23	35	22	22	49	69
648	2017-01-05 11:55:00	1.7	72.3	13	0	157	13	17	25	16	16	35	50
649	2017-01-05 12:05:00	1.6	68.4	13	0	132	11	14	21	13	13	30	42
650	2017-01-05 12:15:00	1.4	68.1	13	0	105	9	11	17	11	11	24	34
651	2017-01-05 12:25:00	1.8	70.3	13	0	163	14	17	26	16	17	37	52
652	2017-01-05 12:35:00	1.6	72.3	13	0	132	11	14	21	13	14	30	42
653	2017-01-05 12:45:00	1.4	73.2	13	0	99	8	11	16	10	10	22	32
654	2017-01-05 12:55:00	1.1	72.4	13	0	66	6	7	11	7	7	15	21
655	2017-01-05 13:05:00	0.9	70.9	13	0	59	5	6	9	6	6	13	19
656	2017-01-05 13:15:00	1.3	66.9	13	0	117	10	12	19	12	12	26	37
657	2017-01-05 13:25:00	1.1	69.5	13	0	75	6	8	12	7	8	17	24
658	2017-01-05 13:35:00	1.7	68.6	13	0	124	11	13	20	12	13	28	40
659	2017-01-05 13:45:00	1.1	68.2	13	0	56	5	6	9	6	6	13	18
660	2017-01-05 13:55:00	0.9	69.4	13	0	54	5	6	9	5	5	12	17
661	2017-01-05 14:05:00	0.7	71.4	13	0	47	4	5	8	5	5	11	15
662	2017-01-05 14:15:00	0.5	72.1	13	0	41	4	4	7	4	4	9	13
663	2017-01-05 14:25:00	0.8	69	13	0	65	6	7	10	7	7	15	21
664	2017-01-05 14:35:00	0.5	69	13	0	38	3	4	6	4	4	9	12
665	2017-01-05 14:45:00	0.5	67.8	13	0	31	3	3	5	3	3	7	10
666	2017-01-05 14:55:00	0.2	69.3	13	0	27	2	3	4	3	3	6	9
667	2017-01-05 15:05:00	0	71.2	13	0	22	2	2	4	2	2	5	7
668	2017-01-05 15:15:00	0	72	13	0	18	2	2	3	2	2	4	6
669	2017-01-05 15:25:00	-0.3	74.3	13	0	13	1	1	2	1	1	3	4
670	2017-01-05 15:35:00	-0.4	76	13	0	8	1	1	1	1	1	2	3
671	2017-01-05 15:45:00	-0.7	77.1	13	0	4	0	0	1	0	0	1	1
672	2017-01-05 15:55:00	-1.1	79.5	13	0	2	0	0	0	0	0	0	1
673	2017-01-05 16:05:00	-1.3	80	13	0	1	0	0	0	0	0	0	0
674	2017-01-05 16:15:00	-1.3	79.8	13	0	0	0	0	0	0	0	0	0
675	2017-01-05 16:25:00	-1.4	79.9	13	0	0	0	0	0	0	0	0	0
676	2017-01-05 16:35:00	-1.2	78.3	13	0	0	0	0	0	0	0	0	0
677	2017-01-05 16:45:00	-1.1	77.3	13	0	0	0	0	0	0	0	0	0
678	2017-01-05 16:55:00	-1.1	77.8	13	0	0	0	0	0	0	0	0	0
679	2017-01-05 17:05:00	-1	77	13	0	0	0	0	0	0	0	0	0
680	2017-01-05 17:15:00	-1.2	78.6	13	0	0	0	0	0	0	0	0	0
681	2017-01-05 17:25:00	-1.5	79.3	13	0	0	0	0	0	0	0	0	0
682	2017-01-05 17:35:00	-1.3	77.6	13	0	0	0	0	0	0	0	0	0
683	2017-01-05 17:45:00	-1.3	76.9	13	0	0	0	0	0	0	0	0	0
684	2017-01-05 17:55:00	-1.1	73.3	13	0	0	0	0	0	0	0	0	0
685	2017-01-05 18:05:00	-1.2	73.2	13	0	0	0	0	0	0	0	0	0
686	2017-01-05 18:15:00	-1.4	75.7	13	0	0	0	0	0	0	0	0	0
687	2017-01-05 18:25:00	-1.6	76.5	13	0	0	0	0	0	0	0	0	0
688	2017-01-05 18:35:00	-1.4	73.5	13	0	0	0	0	0	0	0	0	0
689	2017-01-05 18:45:00	-1.5	72.8	13	0	0	0	0	0	0	0	0	0
690	2017-01-05 18:55:00	-1.7	74.9	13	0	0	0	0	0	0	0	0	0
691	2017-01-05 19:05:00	-1.9	75.9	13	0	0	0	0	0	0	0	0	0
692	2017-01-05 19:15:00	-2	76.1	13	0	0	0	0	0	0	0	0	0
693	2017-01-05 19:25:00	-2	75.7	13	0	0	0	0	0	0	0	0	0
694	2017-01-05 19:35:00	-1.8	71.2	13	0	0	0	0	0	0	0	0	0
695	2017-01-05 19:45:00	-1.7	71	13	0	0	0	0	0	0	0	0	0
696	2017-01-05 19:55:00	-1.9	70.9	13	0	0	0	0	0	0	0	0	0
697	2017-01-05 20:05:00	-2.1	70.5	13	0	0	0	0	0	0	0	0	0
698	2017-01-05 20:15:00	-2.2	69.5	13	0	0	0	0	0	0	0	0	0
699	2017-01-05 20:25:00	-2.2	71.5	13	0	0	0	0	0	0	0	0	0
700	2017-01-05 20:35:00	-2.3	72.6	13	0	0	0	0	0	0	0	0	0
701	2017-01-05 20:45:00	-2.4	73.8	13	0	0	0	0	0	0	0	0	0
702	2017-01-05 20:55:00	-2.5	73.8	13	0	0	0	0	0	0	0	0	0
703	2017-01-05 21:05:00	-2.5	74.2	13	0	0	0	0	0	0	0	0	0
704	2017-01-05 21:15:00	-2.5	74.6	13	0	0	0	0	0	0	0	0	0
705	2017-01-05 21:25:00	-2.7	74.6	13	0	0	0	0	0	0	0	0	0
706	2017-01-05 21:35:00	-2.7	75.1	13	0	0	0	0	0	0	0	0	0
707	2017-01-05 21:45:00	-2.9	76.6	13	0	0	0	0	0	0	0	0	0
708	2017-01-05 21:55:00	-2.9	78.6	13	0	0	0	0	0	0	0	0	0
709	2017-01-05 22:05:00	-3	76.9	13	0	0	0	0	0	0	0	0	0
710	2017-01-05 22:15:00	-3.2	76.4	13	0	0	0	0	0	0	0	0	0
711	2017-01-05 22:25:00	-3.5	78.9	13	0	0	0	0	0	0	0	0	0
712	2017-01-05 22:35:00	-3.5	79	13	0	0	0	0	0	0	0	0	0
713	2017-01-05 22:45:00	-3.6	80	13	0	0	0	0	0	0	0	0	0
714	2017-01-05 22:55:00	-3.7	80	13	0	0	0	0	0	0	0	0	0
715	2017-01-05 23:05:00	-3.6	78.1	13	0	0	0	0	0	0	0	0	0
716	2017-01-05 23:15:00	-3.5	76.8	13	0	0	0	0	0	0	0	0	0
717	2017-01-05 23:25:00	-3.5	78.3	13	0	0	0	0	0	0	0	0	0
718	2017-01-05 23:35:00	-3.4	77.9	13	0	0	0	0	0	0	0	0	0
719	2017-01-05 23:45:00	-3.3	76	13	0	0	0	0	0	0	0	0	0
720	2017-01-05 23:55:00	-3.4	76.1	13	0	0	0	0	0	0	0	0	0
721	2017-01-06 00:05:00	-3.3	77.2	13	0	0	0	0	0	0	0	0	0
722	2017-01-06 00:15:00	-3.5	76	13	0	0	0	0	0	0	0	0	0
723	2017-01-06 00:25:00	-3.6	76.1	13	0	0	0	0	0	0	0	0	0
724	2017-01-06 00:35:00	-4	80	13	0	0	0	0	0	0	0	0	0
725	2017-01-06 00:45:00	-4.1	80	13	0	0	0	0	0	0	0	0	0
726	2017-01-06 00:55:00	-4.7	80	13	0	0	0	0	0	0	0	0	0
727	2017-01-06 01:05:00	-4.4	80	13	0	0	0	0	0	0	0	0	0
728	2017-01-06 01:15:00	-4.5	80	13	0	0	0	0	0	0	0	0	0
729	2017-01-06 01:25:00	-4.5	80	13	0	0	0	0	0	0	0	0	0
730	2017-01-06 01:35:00	-4.5	80	13	0	0	0	0	0	0	0	0	0
731	2017-01-06 01:45:00	-4.4	80	13	0	0	0	0	0	0	0	0	0
732	2017-01-06 01:55:00	-4.4	80	13	0	0	0	0	0	0	0	0	0
733	2017-01-06 02:05:00	-4.6	80	13	0	0	0	0	0	0	0	0	0
734	2017-01-06 02:15:00	-4.7	80	13	0	0	0	0	0	0	0	0	0
735	2017-01-06 02:25:00	-4.8	80	13	0	0	0	0	0	0	0	0	0
736	2017-01-06 02:35:00	-4.8	80	13	0	0	0	0	0	0	0	0	0
737	2017-01-06 02:45:00	-4.7	80	13	0	0	0	0	0	0	0	0	0
738	2017-01-06 02:55:00	-4.7	80	13	0	0	0	0	0	0	0	0	0
739	2017-01-06 03:05:00	-4.7	80	13	0	0	0	0	0	0	0	0	0
740	2017-01-06 03:15:00	-4.9	80	13	0	0	0	0	0	0	0	0	0
741	2017-01-06 03:25:00	-5	80	13	0	0	0	0	0	0	0	0	0
742	2017-01-06 03:35:00	-4.8	80	13	0	0	0	0	0	0	0	0	0
743	2017-01-06 03:45:00	-5	80	13	0	0	0	0	0	0	0	0	0
744	2017-01-06 03:55:00	-5	80	13	0	0	0	0	0	0	0	0	0
745	2017-01-06 04:05:00	-5	80	13	0	0	0	0	0	0	0	0	0
746	2017-01-06 04:15:00	-5	80	13	0	0	0	0	0	0	0	0	0
747	2017-01-06 04:25:00	-5	80	13	0	0	0	0	0	0	0	0	0
748	2017-01-06 04:35:00	-5	80	13	0	0	0	0	0	0	0	0	0
749	2017-01-06 04:45:00	-5	80	13	0	0	0	0	0	0	0	0	0
750	2017-01-06 04:55:00	-5	80	13	0	0	0	0	0	0	0	0	0
751	2017-01-06 05:05:00	-5	80	13	0	0	0	0	0	0	0	0	0
752	2017-01-06 05:15:00	-5	80	13	0	0	0	0	0	0	0	0	0
753	2017-01-06 05:25:00	-5	80	13	0	0	0	0	0	0	0	0	0
754	2017-01-06 05:35:00	-5	80	13	0	0	0	0	0	0	0	0	0
755	2017-01-06 05:45:00	-5	80	13	0	0	0	0	0	0	0	0	0
756	2017-01-06 05:55:00	-5	80	13	0	0	0	0	0	0	0	0	0
757	2017-01-06 06:05:00	-5	80	13	0	0	0	0	0	0	0	0	0
758	2017-01-06 06:15:00	-5	80	13	0	0	0	0	0	0	0	0	0
759	2017-01-06 06:25:00	-5	80	13	0	0	0	0	0	0	0	0	0
760	2017-01-06 06:35:00	-5	80	13	0	0	0	0	0	0	0	0	0
761	2017-01-06 06:45:00	-5	80	13	0	0	0	0	0	0	0	0	0
762	2017-01-06 06:55:00	-5	80	13	0	0	0	0	0	0	0	0	0
763	2017-01-06 07:05:00	-5	80	13	0	0	0	0	0	0	0	0	0
764	2017-01-06 07:15:00	-5	80	13	0	1	0	0	0	0	0	0	0
765	2017-01-06 07:25:00	-5	80	13	0	2	0	0	0	0	0	1	1
766	2017-01-06 07:35:00	-5	80	13	0	6	0	1	1	1	1	1	2
767	2017-01-06 07:45:00	-5	80	13	0	10	1	1	2	1	1	2	3
768	2017-01-06 07:55:00	-5	80	13	0	17	1	2	3	2	2	4	5
769	2017-01-06 08:05:00	-5	80	13	0	26	2	3	4	3	3	6	8
770	2017-01-06 08:15:00	-5	80	13	0	36	3	4	6	4	4	8	11
771	2017-01-06 08:25:00	-4.9	80	13	0	54	5	6	9	5	6	12	17
772	2017-01-06 08:35:00	-4.6	80	13	0	62	5	7	10	6	6	14	20
773	2017-01-06 08:45:00	-4.6	80	13	0	56	5	6	9	6	6	13	18
774	2017-01-06 08:55:00	-4.6	80	13	0	40	3	4	6	4	4	9	13
775	2017-01-06 09:05:00	-4.2	80	13	0	69	6	7	11	7	7	16	22
776	2017-01-06 09:15:00	-3.8	80	13	0	108	9	11	17	11	11	24	34
777	2017-01-06 09:25:00	-3.6	79.9	13	0	129	11	14	21	13	13	29	41
778	2017-01-06 09:35:00	-3.5	78.3	13	0	121	10	13	20	12	12	27	39
779	2017-01-06 09:45:00	-3.3	78.1	13	0	151	13	16	24	15	15	34	48
780	2017-01-06 09:55:00	-3.4	78.9	13	0	103	9	11	17	10	11	23	33
781	2017-01-06 10:05:00	-3.1	76.8	13	0	141	12	15	23	14	14	32	45
782	2017-01-06 10:15:00	-2.8	75.9	13	0	158	14	17	25	16	16	36	51
783	2017-01-06 10:25:00	-2.5	74.2	13	0	170	14	18	27	17	17	38	54
784	2017-01-06 10:35:00	-2.2	75.2	13	0	186	16	20	30	19	19	42	59
785	2017-01-06 10:45:00	-2	73.2	13	0	193	16	21	31	19	20	44	62
786	2017-01-06 10:55:00	-1.9	71.8	13	0	202	17	22	32	20	21	46	64
787	2017-01-06 11:05:00	-1.7	70.6	13	0	211	18	22	34	21	22	48	67
788	2017-01-06 11:15:00	-1.6	69.3	13	0	215	18	23	34	21	22	49	68
789	2017-01-06 11:25:00	-1.6	71.1	13	0	187	16	20	30	19	19	42	60
790	2017-01-06 11:35:00	-1.4	68.9	13	0	193	16	21	31	19	20	44	62
791	2017-01-06 11:45:00	-1	66.1	13	0	224	19	24	36	22	23	51	71
792	2017-01-06 11:55:00	-0.9	62.1	13	0	224	19	24	36	22	23	51	71
793	2017-01-06 12:05:00	0	59.7	13	0	220	19	23	35	22	23	50	70
794	2017-01-06 12:15:00	-0.4	60.3	13	0	214	18	23	34	21	22	48	68
795	2017-01-06 12:25:00	-0.9	61.6	13	0	173	15	18	28	17	18	39	55
796	2017-01-06 12:35:00	-1.2	65.6	13	0	141	12	15	23	14	14	32	45
797	2017-01-06 12:45:00	-1.2	66.5	13	0	181	15	19	29	18	18	41	58
798	2017-01-06 12:55:00	-1.2	65.6	13	0	176	15	19	28	18	18	40	56
799	2017-01-06 13:05:00	-0.9	68.2	13	0	169	14	18	27	17	17	38	54
800	2017-01-06 13:15:00	-0.9	65.1	13	0	158	13	17	25	16	16	36	50
801	2017-01-06 13:25:00	-1	70.1	13	0	148	13	16	24	15	15	34	47
802	2017-01-06 13:35:00	-0.9	69.1	13	0	139	12	15	22	14	14	31	44
803	2017-01-06 13:45:00	-1	70.5	13	0	127	11	14	20	13	13	29	41
804	2017-01-06 13:55:00	-1.1	70	13	0	111	9	12	18	11	11	25	35
805	2017-01-06 14:05:00	-1	70.6	13	0	101	9	11	16	10	10	23	32
806	2017-01-06 14:15:00	-1	72.5	13	0	106	9	11	17	11	11	24	34
807	2017-01-06 14:25:00	-1	68.8	13	0	101	9	11	16	10	10	23	32
808	2017-01-06 14:35:00	-0.9	70.9	13	0	84	7	9	14	8	9	19	27
809	2017-01-06 14:45:00	-1	71.2	13	0	66	6	7	11	7	7	15	21
810	2017-01-06 14:55:00	-1.1	73.3	13	0	46	4	5	7	5	5	10	15
811	2017-01-06 15:05:00	-1.2	71.1	13	0	30	3	3	5	3	3	7	9
812	2017-01-06 15:15:00	-1.4	74	13	0	20	2	2	3	2	2	5	6
813	2017-01-06 15:25:00	-1.5	72.9	13	0	14	1	1	2	1	1	3	4
814	2017-01-06 15:35:00	-1.6	75.3	13	0	9	1	1	1	1	1	2	3
815	2017-01-06 15:45:00	-1.8	76.7	13	0	4	0	0	1	0	0	1	1
816	2017-01-06 15:55:00	-1.9	75.8	13	0	2	0	0	0	0	0	0	1
817	2017-01-06 16:05:00	-2.2	80	13	0	0	0	0	0	0	0	0	0
818	2017-01-06 16:15:00	-2.5	80	13	0	0	0	0	0	0	0	0	0
819	2017-01-06 16:25:00	-2.5	80	13	0	0	0	0	0	0	0	0	0
820	2017-01-06 16:35:00	-2.7	80	13	0	0	0	0	0	0	0	0	0
821	2017-01-06 16:45:00	-2.7	80	13	0	0	0	0	0	0	0	0	0
822	2017-01-06 16:55:00	-2.9	80	13	0	0	0	0	0	0	0	0	0
823	2017-01-06 17:05:00	-3	80	13	0	0	0	0	0	0	0	0	0
824	2017-01-06 17:15:00	-3.1	80	13	0	0	0	0	0	0	0	0	0
825	2017-01-06 17:25:00	-3	79.1	13	0	0	0	0	0	0	0	0	0
826	2017-01-06 17:35:00	-2.7	71	13	0	0	0	0	0	0	0	0	0
827	2017-01-06 17:45:00	-3.1	72.1	13	0	0	0	0	0	0	0	0	0
828	2017-01-06 17:55:00	-3.4	72.8	13	0	0	0	0	0	0	0	0	0
829	2017-01-06 18:05:00	-3.6	74.1	13	0	0	0	0	0	0	0	0	0
830	2017-01-06 18:15:00	-3.9	77.3	13	0	0	0	0	0	0	0	0	0
831	2017-01-06 18:25:00	-4.2	80	13	0	0	0	0	0	0	0	0	0
832	2017-01-06 18:35:00	-4.2	77.7	13	0	0	0	0	0	0	0	0	0
833	2017-01-06 18:45:00	-3.9	71.1	13	0	0	0	0	0	0	0	0	0
834	2017-01-06 18:55:00	-4.1	71.5	13	0	0	0	0	0	0	0	0	0
835	2017-01-06 19:05:00	-4	70.4	13	0	0	0	0	0	0	0	0	0
836	2017-01-06 19:15:00	-4.2	72.2	13	0	0	0	0	0	0	0	0	0
837	2017-01-06 19:25:00	-4.4	78.7	13	0	0	0	0	0	0	0	0	0
838	2017-01-06 19:35:00	-4.3	76.7	13	0	0	0	0	0	0	0	0	0
839	2017-01-06 19:45:00	-4.4	79.5	13	0	0	0	0	0	0	0	0	0
840	2017-01-06 19:55:00	-4.2	77.9	13	0	0	0	0	0	0	0	0	0
841	2017-01-06 20:05:00	-4	79.3	13	0	0	0	0	0	0	0	0	0
842	2017-01-06 20:15:00	-4.2	80	13	0	0	0	0	0	0	0	0	0
843	2017-01-06 20:25:00	-4.4	80	13	0	0	0	0	0	0	0	0	0
844	2017-01-06 20:35:00	-4.5	80	13	0	0	0	0	0	0	0	0	0
845	2017-01-06 20:45:00	-4.5	80	13	0	0	0	0	0	0	0	0	0
846	2017-01-06 20:55:00	-4.7	80	13	0	0	0	0	0	0	0	0	0
847	2017-01-06 21:05:00	-4.7	80	13	0	0	0	0	0	0	0	0	0
848	2017-01-06 21:15:00	-4.6	80	13	0	0	0	0	0	0	0	0	0
849	2017-01-06 21:25:00	-4.7	80	13	0	0	0	0	0	0	0	0	0
850	2017-01-06 21:35:00	-4.9	80	13	0	0	0	0	0	0	0	0	0
851	2017-01-06 21:45:00	-5	80	13	0	0	0	0	0	0	0	0	0
852	2017-01-06 21:55:00	-5	80	13	0	0	0	0	0	0	0	0	0
853	2017-01-06 22:05:00	-4.9	80	13	0	0	0	0	0	0	0	0	0
854	2017-01-06 22:15:00	-4.8	80	13	0	0	0	0	0	0	0	0	0
855	2017-01-06 22:25:00	-4.6	80	13	0	0	0	0	0	0	0	0	0
856	2017-01-06 22:35:00	-4.5	80	13	0	0	0	0	0	0	0	0	0
857	2017-01-06 22:45:00	-4.4	80	13	0	0	0	0	0	0	0	0	0
858	2017-01-06 22:55:00	-4.2	80	13	0	0	0	0	0	0	0	0	0
859	2017-01-06 23:05:00	-4.2	80	13	0	0	0	0	0	0	0	0	0
860	2017-01-06 23:15:00	-4.1	80	13	0	0	0	0	0	0	0	0	0
861	2017-01-06 23:25:00	-4	80	13	0	0	0	0	0	0	0	0	0
862	2017-01-06 23:35:00	-3.9	79.7	13	0	0	0	0	0	0	0	0	0
863	2017-01-06 23:45:00	-3.9	79.6	13	0	0	0	0	0	0	0	0	0
864	2017-01-06 23:55:00	-3.8	80	13	0	0	0	0	0	0	0	0	0
865	2017-01-07 00:05:00	-3.8	78.2	13	0	0	0	0	0	0	0	0	0
866	2017-01-07 00:15:00	-3.7	78.3	13	0	0	0	0	0	0	0	0	0
867	2017-01-07 00:25:00	-3.8	80	13	0	0	0	0	0	0	0	0	0
868	2017-01-07 00:35:00	-4	80	13	0	0	0	0	0	0	0	0	0
869	2017-01-07 00:45:00	-4.1	80	13	0	0	0	0	0	0	0	0	0
870	2017-01-07 00:55:00	-4.3	80	13	0	0	0	0	0	0	0	0	0
871	2017-01-07 01:05:00	-4.4	80	13	0	0	0	0	0	0	0	0	0
872	2017-01-07 01:15:00	-4.5	80	13	0	0	0	0	0	0	0	0	0
873	2017-01-07 01:25:00	-4.2	80	13	0	0	0	0	0	0	0	0	0
874	2017-01-07 01:35:00	-4	80	13	0	0	0	0	0	0	0	0	0
875	2017-01-07 01:45:00	-3.9	80	13	0	0	0	0	0	0	0	0	0
876	2017-01-07 01:55:00	-3.9	80	13	0	0	0	0	0	0	0	0	0
877	2017-01-07 02:05:00	-3.8	80	13	0	0	0	0	0	0	0	0	0
878	2017-01-07 02:15:00	-3.7	80	13	0	0	0	0	0	0	0	0	0
879	2017-01-07 02:25:00	-3.7	79.5	13	0	0	0	0	0	0	0	0	0
880	2017-01-07 02:35:00	-3.8	79	13	0	0	0	0	0	0	0	0	0
881	2017-01-07 02:45:00	-3.8	79.6	13	0	0	0	0	0	0	0	0	0
882	2017-01-07 02:55:00	-3.7	78.2	13	0	0	0	0	0	0	0	0	0
883	2017-01-07 03:05:00	-3.8	78.7	13	0	0	0	0	0	0	0	0	0
884	2017-01-07 03:15:00	-3.6	79.6	13	0	0	0	0	0	0	0	0	0
885	2017-01-07 03:25:00	-3.5	78.5	13	0	0	0	0	0	0	0	0	0
886	2017-01-07 03:35:00	-3.3	77.1	13	0	0	0	0	0	0	0	0	0
887	2017-01-07 03:45:00	-3.2	76.8	13	0	0	0	0	0	0	0	0	0
888	2017-01-07 03:55:00	-3.2	77.6	13	0	0	0	0	0	0	0	0	0
889	2017-01-07 04:05:00	-3.1	77.2	13	0	0	0	0	0	0	0	0	0
890	2017-01-07 04:15:00	-3	76.6	13	0	0	0	0	0	0	0	0	0
891	2017-01-07 04:25:00	-2.9	75.2	13	0	0	0	0	0	0	0	0	0
892	2017-01-07 04:35:00	-2.8	74.3	13	0	0	0	0	0	0	0	0	0
893	2017-01-07 04:45:00	-2.8	75.3	13	0	0	0	0	0	0	0	0	0
894	2017-01-07 04:55:00	-2.7	75.3	13	0	0	0	0	0	0	0	0	0
895	2017-01-07 05:05:00	-2.7	74.7	13	0	0	0	0	0	0	0	0	0
896	2017-01-07 05:15:00	-2.6	72.3	13	0	0	0	0	0	0	0	0	0
897	2017-01-07 05:25:00	-2.5	73.5	13	0	0	0	0	0	0	0	0	0
898	2017-01-07 05:35:00	-2.5	72.2	13	0	0	0	0	0	0	0	0	0
899	2017-01-07 05:45:00	-2.5	71.5	13	0	0	0	0	0	0	0	0	0
900	2017-01-07 05:55:00	-2.4	71.5	13	0	0	0	0	0	0	0	0	0
901	2017-01-07 06:05:00	-2.4	71.7	13	0	0	0	0	0	0	0	0	0
902	2017-01-07 06:15:00	-2.3	69	13	0	0	0	0	0	0	0	0	0
903	2017-01-07 06:25:00	-2.3	71.8	13	0	0	0	0	0	0	0	0	0
904	2017-01-07 06:35:00	-2.3	71.5	13	0	0	0	0	0	0	0	0	0
905	2017-01-07 06:45:00	-2.3	71.4	13	0	0	0	0	0	0	0	0	0
906	2017-01-07 06:55:00	-2.2	71.8	13	0	0	0	0	0	0	0	0	0
907	2017-01-07 07:05:00	-2.3	74.6	13	0	0	0	0	0	0	0	0	0
908	2017-01-07 07:15:00	-2.2	65.3	13	0	0	0	0	0	0	0	0	0
909	2017-01-07 07:25:00	-1.7	60.5	13	0	1	0	0	0	0	0	0	0
910	2017-01-07 07:35:00	-1.7	61.5	13	0	1	0	0	0	0	0	0	0
911	2017-01-07 07:45:00	-1.7	62.7	13	0	2	0	0	0	0	0	0	1
912	2017-01-07 07:55:00	-1.7	64.6	13	0	4	0	0	1	0	0	1	1
913	2017-01-07 08:05:00	-1.8	65.9	13	0	7	1	1	1	1	1	2	2
914	2017-01-07 08:15:00	-1.8	66.3	13	0	11	1	1	2	1	1	3	4
915	2017-01-07 08:25:00	-1.7	66.6	13	0	14	1	2	2	1	1	3	5
916	2017-01-07 08:35:00	-1.7	67.3	13	0	16	1	2	3	2	2	4	5
917	2017-01-07 08:45:00	-1.7	66.7	13	0	19	2	2	3	2	2	4	6
918	2017-01-07 08:55:00	-1.7	67.2	13	0	17	1	2	3	2	2	4	5
919	2017-01-07 09:05:00	-1.7	70.4	13	0	17	1	2	3	2	2	4	5
920	2017-01-07 09:15:00	-1.7	69	13	0	17	1	2	3	2	2	4	5
921	2017-01-07 09:25:00	-1.7	71.8	13	0	15	1	2	2	1	2	3	5
922	2017-01-07 09:35:00	-1.6	75.3	13	0	16	1	2	3	2	2	4	5
923	2017-01-07 09:45:00	-1.6	75.9	13	0	20	2	2	3	2	2	5	6
924	2017-01-07 09:55:00	-1.7	78.8	13	0	21	2	2	3	2	2	5	7
925	2017-01-07 10:05:00	-1.6	79.9	13	0	26	2	3	4	3	3	6	8
926	2017-01-07 10:15:00	-1.6	80	13	0	29	2	3	5	3	3	7	9
927	2017-01-07 10:25:00	-1.5	80	13	0	30	3	3	5	3	3	7	10
928	2017-01-07 10:35:00	-1.6	80	13	0	30	3	3	5	3	3	7	9
929	2017-01-07 10:45:00	-1.6	80	13	0	33	3	4	5	3	3	8	11
930	2017-01-07 10:55:00	-1.5	80	13	0	31	3	3	5	3	3	7	10
931	2017-01-07 11:05:00	-1.6	80	13	0	32	3	3	5	3	3	7	10
932	2017-01-07 11:15:00	-1.9	80	13	0	37	3	4	6	4	4	8	12
933	2017-01-07 11:25:00	-2	80	13	0	43	4	5	7	4	4	10	14
934	2017-01-07 11:35:00	-1.8	80	13	0	49	4	5	8	5	5	11	15
935	2017-01-07 11:45:00	-1.7	80	13	0	40	3	4	6	4	4	9	13
936	2017-01-07 11:55:00	-1.6	80	13	0	39	3	4	6	4	4	9	12
937	2017-01-07 12:05:00	-1.4	80	13	0	40	3	4	6	4	4	9	13
938	2017-01-07 12:15:00	-1.3	80	13	0	31	3	3	5	3	3	7	10
939	2017-01-07 12:25:00	-1.2	80	13	0	22	2	2	4	2	2	5	7
940	2017-01-07 12:35:00	-1	80	13	0	22	2	2	3	2	2	5	7
941	2017-01-07 12:45:00	-1	80	13	0	22	2	2	4	2	2	5	7
942	2017-01-07 12:55:00	-1	80	13	0	18	1	2	3	2	2	4	6
943	2017-01-07 13:05:00	-0.9	80	13	0	21	2	2	3	2	2	5	7
944	2017-01-07 13:15:00	-0.8	80	13	0	19	2	2	3	2	2	4	6
945	2017-01-07 13:25:00	-0.7	80	13	0	18	2	2	3	2	2	4	6
946	2017-01-07 13:35:00	-0.7	80	13	0	15	1	2	2	2	2	3	5
947	2017-01-07 13:45:00	-0.6	80	13	0	16	1	2	3	2	2	4	5
948	2017-01-07 13:55:00	-0.5	80	13	0	14	1	2	2	1	1	3	5
949	2017-01-07 14:05:00	-0.3	80	13	0	11	1	1	2	1	1	2	3
950	2017-01-07 14:15:00	-0.2	80	13	0	10	1	1	2	1	1	2	3
951	2017-01-07 14:25:00	-0.1	80	13	0	8	1	1	1	1	1	2	2
952	2017-01-07 14:35:00	0	80	13	0	6	1	1	1	1	1	1	2
953	2017-01-07 14:45:00	0.1	80	13	0	6	1	1	1	1	1	1	2
954	2017-01-07 14:55:00	0.2	80	13	0	5	0	1	1	1	1	1	2
955	2017-01-07 15:05:00	0.2	80	13	0	4	0	0	1	0	0	1	1
956	2017-01-07 15:15:00	0.2	80	13	0	3	0	0	0	0	0	1	1
957	2017-01-07 15:25:00	0.3	80	13	0	2	0	0	0	0	0	0	1
958	2017-01-07 15:35:00	0.3	80	13	0	1	0	0	0	0	0	0	0
959	2017-01-07 15:45:00	0.3	80	13	0	1	0	0	0	0	0	0	0
960	2017-01-07 15:55:00	0.4	80	13	0	0	0	0	0	0	0	0	0
961	2017-01-07 16:05:00	0.4	80	13	0	0	0	0	0	0	0	0	0
962	2017-01-07 16:15:00	0.4	80	13	0	0	0	0	0	0	0	0	0
963	2017-01-07 16:25:00	0.4	80	13	0	0	0	0	0	0	0	0	0
964	2017-01-07 16:35:00	0.5	80	13	0	0	0	0	0	0	0	0	0
965	2017-01-07 16:45:00	0.5	80	13	0	0	0	0	0	0	0	0	0
966	2017-01-07 16:55:00	0.5	80	13	0	0	0	0	0	0	0	0	0
967	2017-01-07 17:05:00	0.5	80	13	0	0	0	0	0	0	0	0	0
968	2017-01-07 17:15:00	0.6	80	13	0	0	0	0	0	0	0	0	0
969	2017-01-07 17:25:00	0.6	80	13	0	0	0	0	0	0	0	0	0
970	2017-01-07 17:35:00	0.6	80	13	0	0	0	0	0	0	0	0	0
971	2017-01-07 17:45:00	0.6	80	13	0	0	0	0	0	0	0	0	0
972	2017-01-07 17:55:00	0.6	80	13	0	0	0	0	0	0	0	0	0
973	2017-01-07 18:05:00	0.6	80	13	0	0	0	0	0	0	0	0	0
974	2017-01-07 18:15:00	0.7	80	13	0	0	0	0	0	0	0	0	0
975	2017-01-07 18:25:00	0.7	80	13	0	0	0	0	0	0	0	0	0
976	2017-01-07 18:35:00	0.7	80	13	0	0	0	0	0	0	0	0	0
977	2017-01-07 18:45:00	0.7	80	13	0	0	0	0	0	0	0	0	0
978	2017-01-07 18:55:00	0.8	80	13	0	0	0	0	0	0	0	0	0
979	2017-01-07 19:05:00	0.8	80	13	0	0	0	0	0	0	0	0	0
980	2017-01-07 19:15:00	0.8	80	13	0	0	0	0	0	0	0	0	0
981	2017-01-07 19:25:00	0.8	80	13	0	0	0	0	0	0	0	0	0
982	2017-01-07 19:35:00	0.8	80	13	0	0	0	0	0	0	0	0	0
983	2017-01-07 19:45:00	0.9	80	13	0	0	0	0	0	0	0	0	0
984	2017-01-07 19:55:00	0.9	80	13	0	0	0	0	0	0	0	0	0
985	2017-01-07 20:05:00	0.9	80	13	0	0	0	0	0	0	0	0	0
986	2017-01-07 20:15:00	0.9	80	13	0	0	0	0	0	0	0	0	0
987	2017-01-07 20:25:00	0.9	80	13	0	0	0	0	0	0	0	0	0
988	2017-01-07 20:35:00	0.9	80	13	0	0	0	0	0	0	0	0	0
989	2017-01-07 20:45:00	0.9	80	13	0	0	0	0	0	0	0	0	0
990	2017-01-07 20:55:00	1	80	13	0	0	0	0	0	0	0	0	0
991	2017-01-07 21:05:00	1	80	13	0	0	0	0	0	0	0	0	0
992	2017-01-07 21:15:00	1	80	13	0	0	0	0	0	0	0	0	0
993	2017-01-07 21:25:00	1.1	80	13	0	0	0	0	0	0	0	0	0
994	2017-01-07 21:35:00	1.1	80	13	0	0	0	0	0	0	0	0	0
995	2017-01-07 21:45:00	1.1	80	13	0	0	0	0	0	0	0	0	0
996	2017-01-07 21:55:00	1.1	80	13	0	0	0	0	0	0	0	0	0
997	2017-01-07 22:05:00	1.1	80	13	0	0	0	0	0	0	0	0	0
998	2017-01-07 22:15:00	1.2	80	13	0	0	0	0	0	0	0	0	0
999	2017-01-07 22:25:00	1.1	80	13	0	0	0	0	0	0	0	0	0
1000	2017-01-07 22:35:00	1.2	80	13	0	0	0	0	0	0	0	0	0
1001	2017-01-07 22:45:00	1.2	80	13	0	0	0	0	0	0	0	0	0
1002	2017-01-07 22:55:00	1.1	80	13	0	0	0	0	0	0	0	0	0
1003	2017-01-07 23:05:00	1.2	80	13	0	0	0	0	0	0	0	0	0
1004	2017-01-07 23:15:00	1.2	80	13	0	0	0	0	0	0	0	0	0
1005	2017-01-07 23:25:00	1.3	80	13	0	0	0	0	0	0	0	0	0
1006	2017-01-07 23:35:00	1.3	80	13	0	0	0	0	0	0	0	0	0
1007	2017-01-07 23:45:00	1.4	80	13	0	0	0	0	0	0	0	0	0
1008	2017-01-07 23:55:00	1.4	80	13	0	0	0	0	0	0	0	0	0
1009	2017-01-08 00:05:00	1.5	80	13	0	0	0	0	0	0	0	0	0
1010	2017-01-08 00:15:00	1.4	80	13	0	0	0	0	0	0	0	0	0
1011	2017-01-08 00:25:00	1.4	80	13	0	0	0	0	0	0	0	0	0
1012	2017-01-08 00:35:00	1.4	80	13	0	0	0	0	0	0	0	0	0
1013	2017-01-08 00:45:00	1.5	80	13	0	0	0	0	0	0	0	0	0
1014	2017-01-08 00:55:00	1.6	80	13	0	0	0	0	0	0	0	0	0
1015	2017-01-08 01:05:00	1.6	80	13	0	0	0	0	0	0	0	0	0
1016	2017-01-08 01:15:00	1.6	80	13	0	0	0	0	0	0	0	0	0
1017	2017-01-08 01:25:00	1.6	80	13	0	0	0	0	0	0	0	0	0
1018	2017-01-08 01:35:00	1.7	80	13	0	0	0	0	0	0	0	0	0
1019	2017-01-08 01:45:00	1.8	80	13	0	0	0	0	0	0	0	0	0
1020	2017-01-08 01:55:00	1.8	80	13	0	0	0	0	0	0	0	0	0
1021	2017-01-08 02:05:00	1.8	80	13	0	0	0	0	0	0	0	0	0
1022	2017-01-08 02:15:00	1.8	80	13	0	0	0	0	0	0	0	0	0
1023	2017-01-08 02:25:00	1.7	80	13	0	0	0	0	0	0	0	0	0
1024	2017-01-08 02:35:00	1.8	80	13	0	0	0	0	0	0	0	0	0
1025	2017-01-08 02:45:00	1.8	80	13	0	0	0	0	0	0	0	0	0
1026	2017-01-08 02:55:00	1.7	80	13	0	0	0	0	0	0	0	0	0
1027	2017-01-08 03:05:00	1.7	80	13	0	0	0	0	0	0	0	0	0
1028	2017-01-08 03:15:00	1.8	80	13	0	0	0	0	0	0	0	0	0
1029	2017-01-08 03:25:00	1.9	80	13	0	0	0	0	0	0	0	0	0
1030	2017-01-08 03:35:00	1.8	80	13	0	0	0	0	0	0	0	0	0
1031	2017-01-08 03:45:00	1.8	80	13	0	0	0	0	0	0	0	0	0
1032	2017-01-08 03:55:00	1.9	80	13	0	0	0	0	0	0	0	0	0
1033	2017-01-08 04:05:00	1.9	80	13	0	0	0	0	0	0	0	0	0
1034	2017-01-08 04:15:00	1.9	80	13	0	0	0	0	0	0	0	0	0
1035	2017-01-08 04:25:00	1.9	80	13	0	0	0	0	0	0	0	0	0
1036	2017-01-08 04:35:00	2	80	13	3.12	0	0	0	0	0	0	0	0
1037	2017-01-08 04:45:00	2.1	80	13	0	0	0	0	0	0	0	0	0
1038	2017-01-08 04:55:00	2.2	80	13	0	0	0	0	0	0	0	0	0
1039	2017-01-08 05:05:00	2.1	80	13	0	0	0	0	0	0	0	0	0
1040	2017-01-08 05:15:00	2.1	80	13	0	0	0	0	0	0	0	0	0
1041	2017-01-08 05:25:00	2.1	80	13	0	0	0	0	0	0	0	0	0
1042	2017-01-08 05:35:00	2.1	80	13	0	0	0	0	0	0	0	0	0
1043	2017-01-08 05:45:00	2.1	80	13	0	0	0	0	0	0	0	0	0
1044	2017-01-08 05:55:00	2.1	80	13	0	0	0	0	0	0	0	0	0
1045	2017-01-08 06:05:00	2.1	80	13	0	0	0	0	0	0	0	0	0
1046	2017-01-08 06:15:00	2.1	80	13	0	0	0	0	0	0	0	0	0
1047	2017-01-08 06:25:00	2.1	80	13	0	0	0	0	0	0	0	0	0
1048	2017-01-08 06:35:00	2.1	80	13	0	0	0	0	0	0	0	0	0
1049	2017-01-08 06:45:00	2.1	80	13	0	0	0	0	0	0	0	0	0
1050	2017-01-08 06:55:00	2.1	80	13	0	0	0	0	0	0	0	0	0
1051	2017-01-08 07:05:00	2	80	13	0	0	0	0	0	0	0	0	0
1052	2017-01-08 07:15:00	1.8	80	13	0	0	0	0	0	0	0	0	0
1053	2017-01-08 07:25:00	2.1	80	13	0	1	0	0	0	0	0	0	0
1054	2017-01-08 07:35:00	2.1	80	13	0	2	0	0	0	0	0	1	1
1055	2017-01-08 07:45:00	1.9	80	13	0	4	0	0	1	0	0	1	1
1056	2017-01-08 07:55:00	2.1	80	13	0	7	1	1	1	1	1	1	2
1057	2017-01-08 08:05:00	2	80	13	0	8	1	1	1	1	1	2	2
1058	2017-01-08 08:15:00	1.9	80	13	0	9	1	1	2	1	1	2	3
1059	2017-01-08 08:25:00	2.1	80	13	0	10	1	1	2	1	1	2	3
1060	2017-01-08 08:35:00	2.2	80	13	0	10	1	1	2	1	1	2	3
1061	2017-01-08 08:45:00	2.2	80	13	0	10	1	1	2	1	1	2	3
1062	2017-01-08 08:55:00	2.5	80	13	0	16	1	2	3	2	2	4	5
1063	2017-01-08 09:05:00	2.5	80	13	0	16	1	2	3	2	2	4	5
1064	2017-01-08 09:15:00	2.6	80	13	0	19	2	2	3	2	2	4	6
1065	2017-01-08 09:25:00	2.7	80	13	0	22	2	2	4	2	2	5	7
1066	2017-01-08 09:35:00	2.7	80	13	0	29	3	3	5	3	3	7	9
1067	2017-01-08 09:45:00	2.8	80	13	0	31	3	3	5	3	3	7	10
1068	2017-01-08 09:55:00	2.8	80	13	0	41	3	4	7	4	4	9	13
1069	2017-01-08 10:05:00	2.9	80	13	0	48	4	5	8	5	5	11	15
1070	2017-01-08 10:15:00	3	80	13	0	54	5	6	9	5	6	12	17
1071	2017-01-08 10:25:00	3	80	13	0	60	5	6	10	6	6	14	19
1072	2017-01-08 10:35:00	3	80	13	0	68	6	7	11	7	7	15	22
1073	2017-01-08 10:45:00	3	80	13	0	66	6	7	11	7	7	15	21
1074	2017-01-08 10:55:00	3	80	13	0	64	5	7	10	6	7	15	21
1075	2017-01-08 11:05:00	3.1	80	13	0	72	6	8	12	7	7	16	23
1076	2017-01-08 11:15:00	3.1	80	13	0	67	6	7	11	7	7	15	21
1077	2017-01-08 11:25:00	3.1	80	13	0	62	5	7	10	6	6	14	20
1078	2017-01-08 11:35:00	3.2	80	13	0	61	5	6	10	6	6	14	19
1079	2017-01-08 11:45:00	3.2	80	13	0	60	5	6	10	6	6	14	19
1080	2017-01-08 11:55:00	3.2	80	13	0	59	5	6	9	6	6	13	19
1081	2017-01-08 12:05:00	3.3	80	13	0	57	5	6	9	6	6	13	18
1082	2017-01-08 12:15:00	3.4	80	13	0	61	5	6	10	6	6	14	19
1083	2017-01-08 12:25:00	3.4	80	13	0	54	5	6	9	5	6	12	17
1084	2017-01-08 12:35:00	3.4	80	13	0	52	4	6	8	5	5	12	17
1085	2017-01-08 12:45:00	3.5	80	13	0	49	4	5	8	5	5	11	16
1086	2017-01-08 12:55:00	3.5	80	13	0	52	4	6	8	5	5	12	16
1087	2017-01-08 13:05:00	3.4	80	13	0	50	4	5	8	5	5	11	16
1088	2017-01-08 13:15:00	3.4	80	13	0	44	4	5	7	4	4	10	14
1089	2017-01-08 13:25:00	3.3	80	13	0	38	3	4	6	4	4	9	12
1090	2017-01-08 13:35:00	3.3	80	13	0	37	3	4	6	4	4	8	12
1091	2017-01-08 13:45:00	3.3	80	13	0	33	3	4	5	3	3	7	10
1092	2017-01-08 13:55:00	3.3	80	13	0	29	3	3	5	3	3	7	9
1093	2017-01-08 14:05:00	3.3	80	13	0	25	2	3	4	2	3	6	8
1094	2017-01-08 14:15:00	3.3	80	13	0	23	2	2	4	2	2	5	7
1095	2017-01-08 14:25:00	3.4	80	13	0	24	2	3	4	2	2	5	8
1096	2017-01-08 14:35:00	3.4	80	13	0	22	2	2	4	2	2	5	7
1097	2017-01-08 14:45:00	3.4	80	13	0	17	1	2	3	2	2	4	5
1098	2017-01-08 14:55:00	3.3	80	13	0	14	1	2	2	1	1	3	5
1099	2017-01-08 15:05:00	3.3	80	13	0	14	1	1	2	1	1	3	4
1100	2017-01-08 15:15:00	3	80	13	0	11	1	1	2	1	1	2	3
1101	2017-01-08 15:25:00	2.8	80	13	0	6	1	1	1	1	1	1	2
1102	2017-01-08 15:35:00	2.7	80	13	0	5	0	1	1	0	0	1	2
1103	2017-01-08 15:45:00	2.4	80	13	0	3	0	0	0	0	0	1	1
1104	2017-01-08 15:55:00	2.4	80	13	0	1	0	0	0	0	0	0	0
1105	2017-01-08 16:05:00	2.3	80	13	0	0	0	0	0	0	0	0	0
1106	2017-01-08 16:15:00	2.2	80	13	0	0	0	0	0	0	0	0	0
1107	2017-01-08 16:25:00	2.2	80	13	0	0	0	0	0	0	0	0	0
1108	2017-01-08 16:35:00	2.1	80	13	0	0	0	0	0	0	0	0	0
1109	2017-01-08 16:45:00	2	80	13	0	0	0	0	0	0	0	0	0
1110	2017-01-08 16:55:00	1.8	80	13	0	0	0	0	0	0	0	0	0
1111	2017-01-08 17:05:00	1.8	80	13	0	0	0	0	0	0	0	0	0
1112	2017-01-08 17:15:00	1.9	80	13	0	0	0	0	0	0	0	0	0
1113	2017-01-08 17:25:00	2	80	13	0	0	0	0	0	0	0	0	0
1114	2017-01-08 17:35:00	2.1	80	13	0	0	0	0	0	0	0	0	0
1115	2017-01-08 17:45:00	2	80	13	0	0	0	0	0	0	0	0	0
1116	2017-01-08 17:55:00	2.1	80	13	0	0	0	0	0	0	0	0	0
1117	2017-01-08 18:05:00	2.2	80	13	0	0	0	0	0	0	0	0	0
1118	2017-01-08 18:15:00	2	80	13	0	0	0	0	0	0	0	0	0
1119	2017-01-08 18:25:00	2.2	80	13	0	0	0	0	0	0	0	0	0
1120	2017-01-08 18:35:00	2	80	13	0	0	0	0	0	0	0	0	0
1121	2017-01-08 18:45:00	2.2	80	13	0	0	0	0	0	0	0	0	0
1122	2017-01-08 18:55:00	2	80	13	0	0	0	0	0	0	0	0	0
1123	2017-01-08 19:05:00	1.9	80	13	0	0	0	0	0	0	0	0	0
1124	2017-01-08 19:15:00	1.6	80	13	0	0	0	0	0	0	0	0	0
1125	2017-01-08 19:25:00	1.3	80	13	0	0	0	0	0	0	0	0	0
1126	2017-01-08 19:35:00	1.4	80	13	0	0	0	0	0	0	0	0	0
1127	2017-01-08 19:45:00	1.6	80	13	0	0	0	0	0	0	0	0	0
1128	2017-01-08 19:55:00	1.4	80	13	0	0	0	0	0	0	0	0	0
1129	2017-01-08 20:05:00	1.4	80	13	0	0	0	0	0	0	0	0	0
1130	2017-01-08 20:15:00	1.6	80	13	0	0	0	0	0	0	0	0	0
1131	2017-01-08 20:25:00	1.9	80	13	0	0	0	0	0	0	0	0	0
1132	2017-01-08 20:35:00	1.7	80	13	0	0	0	0	0	0	0	0	0
1133	2017-01-08 20:45:00	1.4	80	13	0	0	0	0	0	0	0	0	0
1134	2017-01-08 20:55:00	1.7	80	13	0	0	0	0	0	0	0	0	0
1135	2017-01-08 21:05:00	1.4	80	13	0	0	0	0	0	0	0	0	0
1136	2017-01-08 21:15:00	1.3	80	13	0	0	0	0	0	0	0	0	0
1137	2017-01-08 21:25:00	1.3	80	13	0	0	0	0	0	0	0	0	0
1138	2017-01-08 21:35:00	1.2	80	13	0	0	0	0	0	0	0	0	0
1139	2017-01-08 21:45:00	1.1	80	13	0	0	0	0	0	0	0	0	0
1140	2017-01-08 21:55:00	1.3	80	13	0	0	0	0	0	0	0	0	0
1141	2017-01-08 22:05:00	1.5	80	13	0	0	0	0	0	0	0	0	0
1142	2017-01-08 22:15:00	1.6	80	13	0	0	0	0	0	0	0	0	0
1143	2017-01-08 22:25:00	1.1	80	13	0	0	0	0	0	0	0	0	0
1144	2017-01-08 22:35:00	1	80	13	0	0	0	0	0	0	0	0	0
1145	2017-01-08 22:45:00	1	80	13	0	0	0	0	0	0	0	0	0
1146	2017-01-08 22:55:00	1.3	80	13	0	0	0	0	0	0	0	0	0
1147	2017-01-08 23:05:00	1.4	80	13	0	0	0	0	0	0	0	0	0
1148	2017-01-08 23:15:00	1	80	13	0	0	0	0	0	0	0	0	0
1149	2017-01-08 23:25:00	1.3	80	13	0	0	0	0	0	0	0	0	0
1150	2017-01-08 23:35:00	1.1	80	13	0	0	0	0	0	0	0	0	0
1151	2017-01-08 23:45:00	1.1	80	13	0	0	0	0	0	0	0	0	0
1152	2017-01-08 23:55:00	1.2	80	13	0	0	0	0	0	0	0	0	0
1153	2017-01-09 00:05:00	1	80	13	0	0	0	0	0	0	0	0	0
1154	2017-01-09 00:15:00	1	80	13	0	0	0	0	0	0	0	0	0
1155	2017-01-09 00:25:00	1.1	80	13	0	0	0	0	0	0	0	0	0
1156	2017-01-09 00:35:00	1.3	80	13	0	0	0	0	0	0	0	0	0
1157	2017-01-09 00:45:00	1.2	80	13	0	0	0	0	0	0	0	0	0
1158	2017-01-09 00:55:00	1.3	80	13	0	0	0	0	0	0	0	0	0
1159	2017-01-09 01:05:00	1.1	80	13	0	0	0	0	0	0	0	0	0
1160	2017-01-09 01:15:00	1.3	80	13	0	0	0	0	0	0	0	0	0
1161	2017-01-09 01:25:00	1.4	80	13	0	0	0	0	0	0	0	0	0
1162	2017-01-09 01:35:00	1.3	80	13	0	0	0	0	0	0	0	0	0
1163	2017-01-09 01:45:00	1.2	80	13	0	0	0	0	0	0	0	0	0
1164	2017-01-09 01:55:00	1.4	80	13	0	0	0	0	0	0	0	0	0
1165	2017-01-09 02:05:00	1.4	80	13	0	0	0	0	0	0	0	0	0
1166	2017-01-09 02:15:00	1.4	80	13	0	0	0	0	0	0	0	0	0
1167	2017-01-09 02:25:00	1.4	80	13	0	0	0	0	0	0	0	0	0
1168	2017-01-09 02:35:00	1.4	80	13	0	0	0	0	0	0	0	0	0
1169	2017-01-09 02:45:00	1.3	80	13	0	0	0	0	0	0	0	0	0
1170	2017-01-09 02:55:00	1.4	80	13	0	0	0	0	0	0	0	0	0
1171	2017-01-09 03:05:00	1.3	80	13	0	0	0	0	0	0	0	0	0
1172	2017-01-09 03:15:00	1.3	80	13	0	0	0	0	0	0	0	0	0
1173	2017-01-09 03:25:00	1.3	80	13	0	0	0	0	0	0	0	0	0
1174	2017-01-09 03:35:00	1.1	80	13	0	0	0	0	0	0	0	0	0
1175	2017-01-09 03:45:00	0.9	80	13	0	0	0	0	0	0	0	0	0
1176	2017-01-09 03:55:00	1	80	13	0	0	0	0	0	0	0	0	0
1177	2017-01-09 04:05:00	1	80	13	0	0	0	0	0	0	0	0	0
1178	2017-01-09 04:15:00	0.9	80	13	0	0	0	0	0	0	0	0	0
1179	2017-01-09 04:25:00	1	80	13	0	0	0	0	0	0	0	0	0
1180	2017-01-09 04:35:00	1	80	13	0	0	0	0	0	0	0	0	0
1181	2017-01-09 04:45:00	0.9	80	13	0	0	0	0	0	0	0	0	0
1182	2017-01-09 04:55:00	0.7	80	13	0	0	0	0	0	0	0	0	0
1183	2017-01-09 05:05:00	0.7	80	13	0	0	0	0	0	0	0	0	0
1184	2017-01-09 05:15:00	0.8	80	13	0	0	0	0	0	0	0	0	0
1185	2017-01-09 05:25:00	0.9	80	13	0	0	0	0	0	0	0	0	0
1186	2017-01-09 05:35:00	1.1	80	13	0	0	0	0	0	0	0	0	0
1187	2017-01-09 05:45:00	0.9	80	13	0	0	0	0	0	0	0	0	0
1188	2017-01-09 05:55:00	0.9	80	13	0	0	0	0	0	0	0	0	0
1189	2017-01-09 06:05:00	0.8	80	13	0	0	0	0	0	0	0	0	0
1190	2017-01-09 06:15:00	0.8	80	13	0	0	0	0	0	0	0	0	0
1191	2017-01-09 06:25:00	0.9	80	13	0	0	0	0	0	0	0	0	0
1192	2017-01-09 06:35:00	0.8	80	13	0	0	0	0	0	0	0	0	0
1193	2017-01-09 06:45:00	0.8	80	13	0	0	0	0	0	0	0	0	0
1194	2017-01-09 06:55:00	0.9	80	13	0	0	0	0	0	0	0	0	0
1195	2017-01-09 07:05:00	0.9	80	13	0	0	0	0	0	0	0	0	0
1196	2017-01-09 07:15:00	1	80	13	0	0	0	0	0	0	0	0	0
1197	2017-01-09 07:25:00	0.9	80	13	0	1	0	0	0	0	0	0	0
1198	2017-01-09 07:35:00	1.2	80	13	0	1	0	0	0	0	0	0	0
1199	2017-01-09 07:45:00	1.1	80	13	0	3	0	0	0	0	0	1	1
1200	2017-01-09 07:55:00	1.3	80	13	0	4	0	0	1	0	0	1	1
1201	2017-01-09 08:05:00	1.4	80	13	0	6	0	1	1	1	1	1	2
1202	2017-01-09 08:15:00	1.3	80	13	0	9	1	1	1	1	1	2	3
1203	2017-01-09 08:25:00	1.4	80	13	0	12	1	1	2	1	1	3	4
1204	2017-01-09 08:35:00	1.5	80	13	0	15	1	2	2	1	2	3	5
1205	2017-01-09 08:45:00	1.7	80	13	0	20	2	2	3	2	2	5	7
1206	2017-01-09 08:55:00	1.7	80	13	0	19	2	2	3	2	2	4	6
1207	2017-01-09 09:05:00	1.8	80	13	0	18	2	2	3	2	2	4	6
1208	2017-01-09 09:15:00	1.9	80	13	0	16	1	2	3	2	2	4	5
1209	2017-01-09 09:25:00	2	80	13	0	17	1	2	3	2	2	4	5
1210	2017-01-09 09:35:00	2	80	13	0	16	1	2	3	2	2	4	5
1211	2017-01-09 09:45:00	2.1	80	13	0	27	2	3	4	3	3	6	9
1212	2017-01-09 09:55:00	2.5	80	13	0	37	3	4	6	4	4	8	12
1213	2017-01-09 10:05:00	2.7	80	13	0	41	4	4	7	4	4	9	13
1214	2017-01-09 10:15:00	2.7	80	13	0	47	4	5	8	5	5	11	15
1215	2017-01-09 10:25:00	2.8	80	13	0	46	4	5	7	5	5	10	15
1216	2017-01-09 10:35:00	3	80	13	0	60	5	6	10	6	6	14	19
1217	2017-01-09 10:45:00	3.4	80	13	0	72	6	8	12	7	7	16	23
1218	2017-01-09 10:55:00	3.6	80	13	0	63	5	7	10	6	6	14	20
1219	2017-01-09 11:05:00	3.9	80	13	0	71	6	8	11	7	7	16	23
1220	2017-01-09 11:15:00	4.1	80	13	0	88	8	9	14	9	9	20	28
1221	2017-01-09 11:25:00	4.4	80	13	0	97	8	10	16	10	10	22	31
1222	2017-01-09 11:35:00	4.8	80	13	0	107	9	11	17	11	11	24	34
1223	2017-01-09 11:45:00	5.1	80	13	0	126	11	13	20	13	13	28	40
1224	2017-01-09 11:55:00	5.4	80	13	0	146	12	16	23	15	15	33	46
1225	2017-01-09 12:05:00	5.5	80	13	0	95	8	10	15	9	10	21	30
1226	2017-01-09 12:15:00	5.6	80	13	0	86	7	9	14	9	9	19	27
1227	2017-01-09 12:25:00	6	80	13	0	88	8	9	14	9	9	20	28
1228	2017-01-09 12:35:00	6.2	80	13	0	87	7	9	14	9	9	20	28
1229	2017-01-09 12:45:00	6.6	78.2	13	0	90	8	10	14	9	9	20	29
1230	2017-01-09 12:55:00	6.6	78.5	13	0	85	7	9	14	9	9	19	27
1231	2017-01-09 13:05:00	6.6	78.5	13	0	66	6	7	11	7	7	15	21
1232	2017-01-09 13:15:00	6.6	79.6	13	0	72	6	8	12	7	7	16	23
1233	2017-01-09 13:25:00	6.9	80	13	0	88	8	9	14	9	9	20	28
1234	2017-01-09 13:35:00	6.8	78.4	13	0	58	5	6	9	6	6	13	19
1235	2017-01-09 13:45:00	6.8	78.5	13	0	44	4	5	7	4	4	10	14
1236	2017-01-09 13:55:00	6.6	79.3	13	0	32	3	3	5	3	3	7	10
1237	2017-01-09 14:05:00	6.5	80	13	0	42	4	4	7	4	4	9	13
1238	2017-01-09 14:15:00	6.5	79.9	13	0	29	2	3	5	3	3	6	9
1239	2017-01-09 14:25:00	6.3	80	13	0	21	2	2	3	2	2	5	7
1240	2017-01-09 14:35:00	6.2	80	13	0	31	3	3	5	3	3	7	10
1241	2017-01-09 14:45:00	6.1	80	13	0	32	3	3	5	3	3	7	10
1242	2017-01-09 14:55:00	6.1	80	13	0	21	2	2	3	2	2	5	7
1243	2017-01-09 15:05:00	5.6	80	13	0	15	1	2	2	1	1	3	5
1244	2017-01-09 15:15:00	5.2	80	13	0	11	1	1	2	1	1	3	4
1245	2017-01-09 15:25:00	5.2	80	13	0	10	1	1	2	1	1	2	3
1246	2017-01-09 15:35:00	5.1	80	13	0	5	0	0	1	0	0	1	1
1247	2017-01-09 15:45:00	5	80	13	0	3	0	0	0	0	0	1	1
1248	2017-01-09 15:55:00	4.8	80	13	0	1	0	0	0	0	0	0	0
1249	2017-01-09 16:05:00	4.6	80	13	0	0	0	0	0	0	0	0	0
1250	2017-01-09 16:15:00	4.2	80	13	0	0	0	0	0	0	0	0	0
1251	2017-01-09 16:25:00	4.2	80	13	0	0	0	0	0	0	0	0	0
1252	2017-01-09 16:35:00	4.3	80	13	0	0	0	0	0	0	0	0	0
1253	2017-01-09 16:45:00	4.4	80	13	0	0	0	0	0	0	0	0	0
1254	2017-01-09 16:55:00	4.5	80	13	0	0	0	0	0	0	0	0	0
1255	2017-01-09 17:05:00	4.5	80	13	0	0	0	0	0	0	0	0	0
1256	2017-01-09 17:15:00	4.5	80	13	0	0	0	0	0	0	0	0	0
1257	2017-01-09 17:25:00	4.6	80	13	0	0	0	0	0	0	0	0	0
1258	2017-01-09 17:35:00	4.8	80	13	0	0	0	0	0	0	0	0	0
1259	2017-01-09 17:45:00	5	80	13	0	0	0	0	0	0	0	0	0
1260	2017-01-09 17:55:00	5	80	13	0	0	0	0	0	0	0	0	0
1261	2017-01-09 18:05:00	5	80	13	0	0	0	0	0	0	0	0	0
1262	2017-01-09 18:15:00	5.2	80	13	0	0	0	0	0	0	0	0	0
1263	2017-01-09 18:25:00	5.2	80	13	0	0	0	0	0	0	0	0	0
1264	2017-01-09 18:35:00	5.3	80	13	0	0	0	0	0	0	0	0	0
1265	2017-01-09 18:45:00	5	80	13	0	0	0	0	0	0	0	0	0
1266	2017-01-09 18:55:00	4.6	80	13	0	0	0	0	0	0	0	0	0
1267	2017-01-09 19:05:00	4.6	80	13	0	0	0	0	0	0	0	0	0
1268	2017-01-09 19:15:00	4.4	80	13	0	0	0	0	0	0	0	0	0
1269	2017-01-09 19:25:00	4	80	13	0	0	0	0	0	0	0	0	0
1270	2017-01-09 19:35:00	4	80	13	0	0	0	0	0	0	0	0	0
1271	2017-01-09 19:45:00	4.1	80	13	0	0	0	0	0	0	0	0	0
1272	2017-01-09 19:55:00	4.1	80	13	0	0	0	0	0	0	0	0	0
1273	2017-01-09 20:05:00	4.1	80	13	0	0	0	0	0	0	0	0	0
1274	2017-01-09 20:15:00	4	80	13	0	0	0	0	0	0	0	0	0
1275	2017-01-09 20:25:00	4.1	80	13	0	0	0	0	0	0	0	0	0
1276	2017-01-09 20:35:00	4.2	80	13	0	0	0	0	0	0	0	0	0
1277	2017-01-09 20:45:00	4.3	80	13	0	0	0	0	0	0	0	0	0
1278	2017-01-09 20:55:00	4.3	80	13	0	0	0	0	0	0	0	0	0
1279	2017-01-09 21:05:00	4.1	80	13	0	0	0	0	0	0	0	0	0
1280	2017-01-09 21:15:00	4.1	80	13	0	0	0	0	0	0	0	0	0
1281	2017-01-09 21:25:00	4.3	80	13	0	0	0	0	0	0	0	0	0
1282	2017-01-09 21:35:00	4.2	80	13	0	0	0	0	0	0	0	0	0
1283	2017-01-09 21:45:00	4.6	80	13	0	0	0	0	0	0	0	0	0
1284	2017-01-09 21:55:00	5.1	80	13	0	0	0	0	0	0	0	0	0
1285	2017-01-09 22:05:00	5	80	13	0	0	0	0	0	0	0	0	0
1286	2017-01-09 22:15:00	4.8	80	13	0	0	0	0	0	0	0	0	0
1287	2017-01-09 22:25:00	4.8	80	13	0	0	0	0	0	0	0	0	0
1288	2017-01-09 22:35:00	4.8	80	13	0	0	0	0	0	0	0	0	0
1289	2017-01-09 22:45:00	4.9	80	13	0	0	0	0	0	0	0	0	0
1290	2017-01-09 22:55:00	4.8	80	13	0	0	0	0	0	0	0	0	0
1291	2017-01-09 23:05:00	4.7	80	13	0	0	0	0	0	0	0	0	0
1292	2017-01-09 23:15:00	4.9	80	13	0	0	0	0	0	0	0	0	0
1293	2017-01-09 23:25:00	4.9	80	13	0	0	0	0	0	0	0	0	0
1294	2017-01-09 23:35:00	4.9	80	13	0	0	0	0	0	0	0	0	0
1295	2017-01-09 23:45:00	4.9	80	13	0	0	0	0	0	0	0	0	0
1296	2017-01-09 23:55:00	4.8	80	13	0	0	0	0	0	0	0	0	0
1297	2017-01-10 00:05:00	4.9	80	13	0	0	0	0	0	0	0	0	0
1298	2017-01-10 00:15:00	4.9	80	13	0	0	0	0	0	0	0	0	0
1299	2017-01-10 00:25:00	4.8	80	13	0	0	0	0	0	0	0	0	0
1300	2017-01-10 00:35:00	4.8	80	13	0	0	0	0	0	0	0	0	0
1301	2017-01-10 00:45:00	4.8	80	13	0	0	0	0	0	0	0	0	0
1302	2017-01-10 00:55:00	4.8	80	13	0	0	0	0	0	0	0	0	0
1303	2017-01-10 01:05:00	4.7	80	13	0	0	0	0	0	0	0	0	0
1304	2017-01-10 01:15:00	4.7	80	13	0	0	0	0	0	0	0	0	0
1305	2017-01-10 01:25:00	4.6	80	13	0	0	0	0	0	0	0	0	0
1306	2017-01-10 01:35:00	4.5	80	13	0	0	0	0	0	0	0	0	0
1307	2017-01-10 01:45:00	4.5	80	13	0	0	0	0	0	0	0	0	0
1308	2017-01-10 01:55:00	4.5	80	13	0	0	0	0	0	0	0	0	0
1309	2017-01-10 02:05:00	4.5	80	13	0	0	0	0	0	0	0	0	0
1310	2017-01-10 02:15:00	4.4	80	13	0	0	0	0	0	0	0	0	0
1311	2017-01-10 02:25:00	4.4	80	13	0	0	0	0	0	0	0	0	0
1312	2017-01-10 02:35:00	4.4	80	13	0	0	0	0	0	0	0	0	0
1313	2017-01-10 02:45:00	4.3	80	13	0	0	0	0	0	0	0	0	0
1314	2017-01-10 02:55:00	4.2	80	13	0	0	0	0	0	0	0	0	0
1315	2017-01-10 03:05:00	4.2	80	13	0	0	0	0	0	0	0	0	0
1316	2017-01-10 03:15:00	4.2	80	13	0	0	0	0	0	0	0	0	0
1317	2017-01-10 03:25:00	4.1	80	13	0	0	0	0	0	0	0	0	0
1318	2017-01-10 03:35:00	4.1	80	13	0	0	0	0	0	0	0	0	0
1319	2017-01-10 03:45:00	4	80	13	0	0	0	0	0	0	0	0	0
1320	2017-01-10 03:55:00	3.9	80	13	0	0	0	0	0	0	0	0	0
1321	2017-01-10 04:05:00	4.3	80	13	0	0	0	0	0	0	0	0	0
1322	2017-01-10 04:15:00	4.6	80	13	0	0	0	0	0	0	0	0	0
1323	2017-01-10 04:25:00	4.5	80	13	0	0	0	0	0	0	0	0	0
1324	2017-01-10 04:35:00	4.6	80	13	0	0	0	0	0	0	0	0	0
1325	2017-01-10 04:45:00	4.5	80	13	0	0	0	0	0	0	0	0	0
1326	2017-01-10 04:55:00	4.4	80	13	0	0	0	0	0	0	0	0	0
1327	2017-01-10 05:05:00	4.3	80	13	0	0	0	0	0	0	0	0	0
1328	2017-01-10 05:15:00	4.2	80	13	2.01	0	0	0	0	0	0	0	0
1329	2017-01-10 05:25:00	4.1	80	13	0	0	0	0	0	0	0	0	0
1330	2017-01-10 05:35:00	4	80	13	0	0	0	0	0	0	0	0	0
1331	2017-01-10 05:45:00	3.9	80	13	0	0	0	0	0	0	0	0	0
1332	2017-01-10 05:55:00	3.9	80	13	0	0	0	0	0	0	0	0	0
1333	2017-01-10 06:05:00	3.9	80	13	0	0	0	0	0	0	0	0	0
1334	2017-01-10 06:15:00	3.9	80	13	0	0	0	0	0	0	0	0	0
1335	2017-01-10 06:25:00	3.9	80	13	0	0	0	0	0	0	0	0	0
1336	2017-01-10 06:35:00	3.9	80	13	0	0	0	0	0	0	0	0	0
1337	2017-01-10 06:45:00	3.9	80	13	0	0	0	0	0	0	0	0	0
1338	2017-01-10 06:55:00	4.1	80	13	0	0	0	0	0	0	0	0	0
1339	2017-01-10 07:05:00	4.2	80	13	0	0	0	0	0	0	0	0	0
1340	2017-01-10 07:15:00	4.1	80	13	0	0	0	0	0	0	0	0	0
1341	2017-01-10 07:25:00	3.9	80	13	0	1	0	0	0	0	0	0	0
1342	2017-01-10 07:35:00	3.9	80	13	0	3	0	0	1	0	0	1	1
1343	2017-01-10 07:45:00	3.7	80	13	0	6	0	1	1	1	1	1	2
1344	2017-01-10 07:55:00	3.9	80	13	0	6	1	1	1	1	1	1	2
1345	2017-01-10 08:05:00	3.9	80	13	0	9	1	1	1	1	1	2	3
1346	2017-01-10 08:15:00	4	80	13	0	11	1	1	2	1	1	3	4
1347	2017-01-10 08:25:00	4	80	13	0	15	1	2	2	2	2	3	5
1348	2017-01-10 08:35:00	4.1	80	13	0	12	1	1	2	1	1	3	4
1349	2017-01-10 08:45:00	4.2	80	13	0	13	1	1	2	1	1	3	4
1350	2017-01-10 08:55:00	4.2	80	13	0	11	1	1	2	1	1	2	4
1351	2017-01-10 09:05:00	4.2	80	13	0	19	2	2	3	2	2	4	6
1352	2017-01-10 09:15:00	4.4	80	13	0	48	4	5	8	5	5	11	15
1353	2017-01-10 09:25:00	4.3	80	13	0	44	4	5	7	4	5	10	14
1354	2017-01-10 09:35:00	4.7	80	13	0	110	9	12	18	11	11	25	35
1355	2017-01-10 09:45:00	4.7	80	13	0	66	6	7	11	7	7	15	21
1356	2017-01-10 09:55:00	5.1	80	13	0	145	12	15	23	14	15	33	46
1357	2017-01-10 10:05:00	4.8	80	13	0	51	4	5	8	5	5	12	16
1358	2017-01-10 10:15:00	5	80	13	0	127	11	14	20	13	13	29	40
1359	2017-01-10 10:25:00	5.2	80	13	0	167	14	18	27	17	17	38	53
1360	2017-01-10 10:35:00	5.3	80	13	0	173	15	18	28	17	18	39	55
1361	2017-01-10 10:45:00	5.5	80	13	0	183	16	19	29	18	19	41	58
1362	2017-01-10 10:55:00	5.5	80	13	0	189	16	20	30	19	19	43	60
1363	2017-01-10 11:05:00	5.8	80	13	0	205	17	22	33	20	21	46	65
1364	2017-01-10 11:15:00	6	80	13	0	214	18	23	34	21	22	48	68
1365	2017-01-10 11:25:00	6	80	13	0	192	16	20	31	19	20	43	61
1366	2017-01-10 11:35:00	6.3	80	13	0	186	16	20	30	19	19	42	59
1367	2017-01-10 11:45:00	6.3	80	13	0	201	17	21	32	20	21	45	64
1368	2017-01-10 11:55:00	6.2	80	13	0	188	16	20	30	19	19	43	60
1369	2017-01-10 12:05:00	6	80	13	0	173	15	18	28	17	18	39	55
1370	2017-01-10 12:15:00	5.8	80	13	0	141	12	15	23	14	14	32	45
1371	2017-01-10 12:25:00	5.8	80	13	0	100	9	11	16	10	10	23	32
1372	2017-01-10 12:35:00	5.8	80	13	0	130	11	14	21	13	13	29	42
1373	2017-01-10 12:45:00	6	80	13	0	152	13	16	24	15	16	34	48
1374	2017-01-10 12:55:00	5.8	80	13	0	113	10	12	18	11	12	26	36
1375	2017-01-10 13:05:00	5.6	80	13	0	95	8	10	15	9	10	21	30
1376	2017-01-10 13:15:00	5.5	80	13	0	81	7	9	13	8	8	18	26
1377	2017-01-10 13:25:00	5.5	80	13	0	94	8	10	15	9	10	21	30
1378	2017-01-10 13:35:00	5.8	80	13	0	153	13	16	25	15	16	35	49
1379	2017-01-10 13:45:00	5.6	80	13	0	98	8	11	16	10	10	22	31
1380	2017-01-10 13:55:00	5.5	80	13	0	75	6	8	12	7	8	17	24
1381	2017-01-10 14:05:00	5.4	80	13	0	55	5	6	9	5	6	12	18
1382	2017-01-10 14:15:00	5.4	80	13	0	41	4	4	7	4	4	9	13
1383	2017-01-10 14:25:00	5.2	80	13	0	34	3	4	5	3	3	8	11
1384	2017-01-10 14:35:00	5	80	13	0	29	2	3	5	3	3	6	9
1385	2017-01-10 14:45:00	4.8	80	13	0	26	2	3	4	3	3	6	8
1386	2017-01-10 14:55:00	4.5	80	13	0	22	2	2	4	2	2	5	7
1387	2017-01-10 15:05:00	4.2	80	13	0	19	2	2	3	2	2	4	6
1388	2017-01-10 15:15:00	4	80	13	0	16	1	2	3	2	2	4	5
1389	2017-01-10 15:25:00	4.1	80	13	0	13	1	1	2	1	1	3	4
1390	2017-01-10 15:35:00	3.4	80	13	0	9	1	1	1	1	1	2	3
1391	2017-01-10 15:45:00	3.1	80	13	0	5	0	1	1	0	1	1	2
1392	2017-01-10 15:55:00	2.5	80	13	0	2	0	0	0	0	0	0	1
1393	2017-01-10 16:05:00	2.7	80	13	0	1	0	0	0	0	0	0	0
1394	2017-01-10 16:15:00	3.6	80	13	0	0	0	0	0	0	0	0	0
1395	2017-01-10 16:25:00	3.8	80	13	0	0	0	0	0	0	0	0	0
1396	2017-01-10 16:35:00	3.9	80	13	0	0	0	0	0	0	0	0	0
1397	2017-01-10 16:45:00	4.2	80	13	0	0	0	0	0	0	0	0	0
1398	2017-01-10 16:55:00	4.3	80	13	0	0	0	0	0	0	0	0	0
1399	2017-01-10 17:05:00	4.3	80	13	0	0	0	0	0	0	0	0	0
1400	2017-01-10 17:15:00	4.5	80	13	0	0	0	0	0	0	0	0	0
1401	2017-01-10 17:25:00	4.5	80	13	0	0	0	0	0	0	0	0	0
1402	2017-01-10 17:35:00	4.4	80	13	0	0	0	0	0	0	0	0	0
1403	2017-01-10 17:45:00	4	80	13	0	0	0	0	0	0	0	0	0
1404	2017-01-10 17:55:00	3.6	80	13	0	0	0	0	0	0	0	0	0
1405	2017-01-10 18:05:00	3.6	80	13	0	0	0	0	0	0	0	0	0
1406	2017-01-10 18:15:00	4	80	13	0	0	0	0	0	0	0	0	0
1407	2017-01-10 18:25:00	4.3	80	13	0	0	0	0	0	0	0	0	0
1408	2017-01-10 18:35:00	4.5	80	13	0	0	0	0	0	0	0	0	0
1409	2017-01-10 18:45:00	4.6	80	13	0	0	0	0	0	0	0	0	0
1410	2017-01-10 18:55:00	4.7	80	13	0	0	0	0	0	0	0	0	0
1411	2017-01-10 19:05:00	4.6	80	13	0	0	0	0	0	0	0	0	0
1412	2017-01-10 19:15:00	4.5	80	13	0	0	0	0	0	0	0	0	0
1413	2017-01-10 19:25:00	4.5	80	13	0	0	0	0	0	0	0	0	0
1414	2017-01-10 19:35:00	4.5	80	13	0	0	0	0	0	0	0	0	0
1415	2017-01-10 19:45:00	4.5	80	13	0	0	0	0	0	0	0	0	0
1416	2017-01-10 19:55:00	4.6	80	13	0	0	0	0	0	0	0	0	0
1417	2017-01-10 20:05:00	4.5	80	13	0	0	0	0	0	0	0	0	0
1418	2017-01-10 20:15:00	4.4	80	13	0	0	0	0	0	0	0	0	0
1419	2017-01-10 20:25:00	4.4	80	13	0	0	0	0	0	0	0	0	0
1420	2017-01-10 20:35:00	4.4	80	13	0	0	0	0	0	0	0	0	0
1421	2017-01-10 20:45:00	4.4	80	13	0	0	0	0	0	0	0	0	0
1422	2017-01-10 20:55:00	4.5	80	13	0	0	0	0	0	0	0	0	0
1423	2017-01-10 21:05:00	4.4	80	13	0	0	0	0	0	0	0	0	0
1424	2017-01-10 21:15:00	4.4	80	13	0	0	0	0	0	0	0	0	0
1425	2017-01-10 21:25:00	4.5	80	13	0	0	0	0	0	0	0	0	0
1426	2017-01-10 21:35:00	4.4	80	13	0	0	0	0	0	0	0	0	0
1427	2017-01-10 21:45:00	4.4	80	13	0	0	0	0	0	0	0	0	0
1428	2017-01-10 21:55:00	4.5	80	13	0	0	0	0	0	0	0	0	0
1429	2017-01-10 22:05:00	4.5	80	13	0	0	0	0	0	0	0	0	0
1430	2017-01-10 22:15:00	4.5	80	13	0	0	0	0	0	0	0	0	0
1431	2017-01-10 22:25:00	4.6	80	13	0	0	0	0	0	0	0	0	0
1432	2017-01-10 22:35:00	4.7	80	13	0	0	0	0	0	0	0	0	0
1433	2017-01-10 22:45:00	4.7	80	13	0	0	0	0	0	0	0	0	0
1434	2017-01-10 22:55:00	4.7	80	13	0	0	0	0	0	0	0	0	0
1435	2017-01-10 23:05:00	4.7	80	13	0	0	0	0	0	0	0	0	0
1436	2017-01-10 23:15:00	4.7	80	13	0	0	0	0	0	0	0	0	0
1437	2017-01-10 23:25:00	4.7	80	13	0	0	0	0	0	0	0	0	0
1438	2017-01-10 23:35:00	4.7	80	13	0	0	0	0	0	0	0	0	0
1439	2017-01-10 23:45:00	4.7	80	13	0	0	0	0	0	0	0	0	0
1440	2017-01-10 23:55:00	4.8	80	13	0	0	0	0	0	0	0	0	0
1441	2017-01-11 00:05:00	4.8	80	13	0	0	0	0	0	0	0	0	0
1442	2017-01-11 00:15:00	4.8	80	13	0	0	0	0	0	0	0	0	0
1443	2017-01-11 00:25:00	4.9	80	13	0	0	0	0	0	0	0	0	0
1444	2017-01-11 00:35:00	4.9	80	13	0	0	0	0	0	0	0	0	0
1445	2017-01-11 00:45:00	4.9	80	13	0	0	0	0	0	0	0	0	0
1446	2017-01-11 00:55:00	5	80	13	0	0	0	0	0	0	0	0	0
1447	2017-01-11 01:05:00	5	80	13	0	0	0	0	0	0	0	0	0
1448	2017-01-11 01:15:00	5.1	80	13	0	0	0	0	0	0	0	0	0
1449	2017-01-11 01:25:00	5	80	13	0	0	0	0	0	0	0	0	0
1450	2017-01-11 01:35:00	5.1	80	13	0	0	0	0	0	0	0	0	0
1451	2017-01-11 01:45:00	5.1	80	13	0	0	0	0	0	0	0	0	0
1452	2017-01-11 01:55:00	5.1	80	13	0	0	0	0	0	0	0	0	0
1453	2017-01-11 02:05:00	5.1	80	13	0	0	0	0	0	0	0	0	0
1454	2017-01-11 02:15:00	5.1	80	13	0	0	0	0	0	0	0	0	0
1455	2017-01-11 02:25:00	5.1	80	13	0	0	0	0	0	0	0	0	0
1456	2017-01-11 02:35:00	5	80	13	0	0	0	0	0	0	0	0	0
1457	2017-01-11 02:45:00	5.1	80	13	0	0	0	0	0	0	0	0	0
1458	2017-01-11 02:55:00	5	80	13	0	0	0	0	0	0	0	0	0
1459	2017-01-11 03:05:00	5	80	13	0	0	0	0	0	0	0	0	0
1460	2017-01-11 03:15:00	5	80	13	0	0	0	0	0	0	0	0	0
1461	2017-01-11 03:25:00	5.1	80	13	0	0	0	0	0	0	0	0	0
1462	2017-01-11 03:35:00	5.1	80	13	0	0	0	0	0	0	0	0	0
1463	2017-01-11 03:45:00	5.1	80	13	0	0	0	0	0	0	0	0	0
1464	2017-01-11 03:55:00	5	80	13	0	0	0	0	0	0	0	0	0
1465	2017-01-11 04:05:00	4.8	80	13	0	0	0	0	0	0	0	0	0
1466	2017-01-11 04:15:00	4.8	80	13	0	0	0	0	0	0	0	0	0
1467	2017-01-11 04:25:00	4.7	80	13	0	0	0	0	0	0	0	0	0
1468	2017-01-11 04:35:00	4.6	80	13	0	0	0	0	0	0	0	0	0
1469	2017-01-11 04:45:00	4.7	80	13	0	0	0	0	0	0	0	0	0
1470	2017-01-11 04:55:00	5.1	80	13	0	0	0	0	0	0	0	0	0
1471	2017-01-11 05:05:00	5.2	80	13	0	0	0	0	0	0	0	0	0
1472	2017-01-11 05:15:00	5.3	80	13	0	0	0	0	0	0	0	0	0
1473	2017-01-11 05:25:00	5.3	80	13	0	0	0	0	0	0	0	0	0
1474	2017-01-11 05:35:00	5.2	80	13	0	0	0	0	0	0	0	0	0
1475	2017-01-11 05:45:00	4.9	80	13	0	0	0	0	0	0	0	0	0
1476	2017-01-11 05:55:00	4.6	80	13	0	0	0	0	0	0	0	0	0
1477	2017-01-11 06:05:00	4.4	80	13	0	0	0	0	0	0	0	0	0
1478	2017-01-11 06:15:00	4.7	80	13	0	0	0	0	0	0	0	0	0
1479	2017-01-11 06:25:00	5	80	13	0	0	0	0	0	0	0	0	0
1480	2017-01-11 06:35:00	5.3	80	13	0	0	0	0	0	0	0	0	0
1481	2017-01-11 06:45:00	5.6	80	13	0	0	0	0	0	0	0	0	0
1482	2017-01-11 06:55:00	5.7	79	13	0	0	0	0	0	0	0	0	0
1483	2017-01-11 07:05:00	5.9	78.4	13	0	0	0	0	0	0	0	0	0
1484	2017-01-11 07:15:00	6	78.5	13	0	1	0	0	0	0	0	0	0
1485	2017-01-11 07:25:00	6	78.9	13	0	1	0	0	0	0	0	0	0
1486	2017-01-11 07:35:00	6	80	13	0	3	0	0	0	0	0	1	1
1487	2017-01-11 07:45:00	6.1	80	13	0	4	0	0	1	0	0	1	1
1488	2017-01-11 07:55:00	6	80	13	0	4	0	0	1	0	0	1	1
1489	2017-01-11 08:05:00	6.1	80	13	0	5	0	1	1	0	0	1	2
1490	2017-01-11 08:15:00	6.1	80	13	0	9	1	1	1	1	1	2	3
1491	2017-01-11 08:25:00	6.2	80	13	0	11	1	1	2	1	1	3	4
1492	2017-01-11 08:35:00	6.2	80	13	0	13	1	1	2	1	1	3	4
1493	2017-01-11 08:45:00	6.2	80	13	0	16	1	2	3	2	2	4	5
1494	2017-01-11 08:55:00	6.3	80	13	0	19	2	2	3	2	2	4	6
1495	2017-01-11 09:05:00	6.3	80	13	0	17	1	2	3	2	2	4	5
1496	2017-01-11 09:15:00	6.3	80	13	0	23	2	2	4	2	2	5	7
1497	2017-01-11 09:25:00	6.4	80	13	0	21	2	2	3	2	2	5	7
1498	2017-01-11 09:35:00	6.7	80	13	0	39	3	4	6	4	4	9	12
1499	2017-01-11 09:45:00	6.8	80	13	0	31	3	3	5	3	3	7	10
1500	2017-01-11 09:55:00	6.9	80	13	0	34	3	4	5	3	3	8	11
1501	2017-01-11 10:05:00	7	80	13	0	38	3	4	6	4	4	9	12
1502	2017-01-11 10:15:00	7	80	13	0	36	3	4	6	4	4	8	11
1503	2017-01-11 10:25:00	6.9	80	13	0	50	4	5	8	5	5	11	16
1504	2017-01-11 10:35:00	6.9	80	13	0	56	5	6	9	6	6	13	18
1505	2017-01-11 10:45:00	6.9	80	13	0	80	7	9	13	8	8	18	26
1506	2017-01-11 10:55:00	7	80	13	0	70	6	7	11	7	7	16	22
1507	2017-01-11 11:05:00	7.1	80	13	0	47	4	5	8	5	5	11	15
1508	2017-01-11 11:15:00	7.1	80	13	0	42	4	4	7	4	4	10	13
1509	2017-01-11 11:25:00	7.1	80	13	0	54	5	6	9	5	5	12	17
1510	2017-01-11 11:35:00	7	80	13	0	61	5	6	10	6	6	14	19
1511	2017-01-11 11:45:00	6.8	80	13	0	40	3	4	6	4	4	9	13
1512	2017-01-11 11:55:00	6.8	80	13	0	30	3	3	5	3	3	7	10
1513	2017-01-11 12:05:00	6.9	80	13	0	23	2	3	4	2	2	5	7
1514	2017-01-11 12:15:00	6.9	80	13	0	24	2	3	4	2	2	5	8
1515	2017-01-11 12:25:00	7	80	13	0	20	2	2	3	2	2	4	6
1516	2017-01-11 12:35:00	7.1	80	13	0	17	1	2	3	2	2	4	6
1517	2017-01-11 12:45:00	7.3	80	13	0	15	1	2	2	1	2	3	5
1518	2017-01-11 12:55:00	7.4	80	13	0	14	1	2	2	1	1	3	5
1519	2017-01-11 13:05:00	7.5	80	13	0	19	2	2	3	2	2	4	6
1520	2017-01-11 13:15:00	7.5	80	13	0	15	1	2	2	1	2	3	5
1521	2017-01-11 13:25:00	7.4	80	13	0	11	1	1	2	1	1	3	4
1522	2017-01-11 13:35:00	7.6	80	13	0	12	1	1	2	1	1	3	4
1523	2017-01-11 13:45:00	7.7	80	13	0	38	3	4	6	4	4	9	12
1524	2017-01-11 13:55:00	7.9	80	13	0	51	4	5	8	5	5	11	16
1525	2017-01-11 14:05:00	8	80	13	0	62	5	7	10	6	6	14	20
1526	2017-01-11 14:15:00	8.1	80	13	0	63	5	7	10	6	6	14	20
1527	2017-01-11 14:25:00	8	80	13	0	15	1	2	2	2	2	3	5
1528	2017-01-11 14:35:00	7.9	80	13	0	10	1	1	2	1	1	2	3
1529	2017-01-11 14:45:00	7.9	80	13	0	6	0	1	1	1	1	1	2
1530	2017-01-11 14:55:00	7.8	80	13	0	7	1	1	1	1	1	2	2
1531	2017-01-11 15:05:00	7.9	80	13	0	11	1	1	2	1	1	3	4
1532	2017-01-11 15:15:00	7.8	80	13	0	12	1	1	2	1	1	3	4
1533	2017-01-11 15:25:00	8	80	13	0	6	1	1	1	1	1	1	2
1534	2017-01-11 15:35:00	8.2	80	13	0	5	0	1	1	1	1	1	2
1535	2017-01-11 15:45:00	8.2	78	13	0	5	0	1	1	0	0	1	2
1536	2017-01-11 15:55:00	7.6	77.4	13	0	1	0	0	0	0	0	0	0
1537	2017-01-11 16:05:00	5.2	80	13	0	0	0	0	0	0	0	0	0
1538	2017-01-11 16:15:00	5.5	80	13	0	0	0	0	0	0	0	0	0
1539	2017-01-11 16:25:00	6	80	13	0	0	0	0	0	0	0	0	0
1540	2017-01-11 16:35:00	6.3	77.7	13	0	0	0	0	0	0	0	0	0
1541	2017-01-11 16:45:00	6.5	75.2	13	0	0	0	0	0	0	0	0	0
1542	2017-01-11 16:55:00	6.3	75.1	13	0	0	0	0	0	0	0	0	0
1543	2017-01-11 17:05:00	6.4	73.3	13	0	0	0	0	0	0	0	0	0
1544	2017-01-11 17:15:00	6.1	76.5	13	0	0	0	0	0	0	0	0	0
1545	2017-01-11 17:25:00	6.2	76.7	13	0	0	0	0	0	0	0	0	0
1546	2017-01-11 17:35:00	6.3	76.4	13	0	0	0	0	0	0	0	0	0
1547	2017-01-11 17:45:00	6.3	75.8	13	0	0	0	0	0	0	0	0	0
1548	2017-01-11 17:55:00	6.3	76.9	13	0	0	0	0	0	0	0	0	0
1549	2017-01-11 18:05:00	6.3	76.4	13	0	0	0	0	0	0	0	0	0
1550	2017-01-11 18:15:00	6.5	75.8	13	0	0	0	0	0	0	0	0	0
1551	2017-01-11 18:25:00	6.5	75.7	13	0	0	0	0	0	0	0	0	0
1552	2017-01-11 18:35:00	6.3	76.8	13	0	0	0	0	0	0	0	0	0
1553	2017-01-11 18:45:00	6.2	76.8	13	0	0	0	0	0	0	0	0	0
1554	2017-01-11 18:55:00	6.1	76.9	13	0	0	0	0	0	0	0	0	0
1555	2017-01-11 19:05:00	6	76.8	13	0	0	0	0	0	0	0	0	0
1556	2017-01-11 19:15:00	5.9	76.1	13	0	0	0	0	0	0	0	0	0
1557	2017-01-11 19:25:00	5.9	74.8	13	0	0	0	0	0	0	0	0	0
1558	2017-01-11 19:35:00	5.9	75.4	13	0	0	0	0	0	0	0	0	0
1559	2017-01-11 19:45:00	5.7	75.4	13	0	0	0	0	0	0	0	0	0
1560	2017-01-11 19:55:00	5.8	74.4	13	0	0	0	0	0	0	0	0	0
1561	2017-01-11 20:05:00	5.9	73.7	13	0	0	0	0	0	0	0	0	0
1562	2017-01-11 20:15:00	5.8	73.4	13	0	0	0	0	0	0	0	0	0
1563	2017-01-11 20:25:00	5.6	74.2	13	0	0	0	0	0	0	0	0	0
1564	2017-01-11 20:35:00	5.5	75.3	13	0	0	0	0	0	0	0	0	0
1565	2017-01-11 20:45:00	5.5	75.4	13	0	0	0	0	0	0	0	0	0
1566	2017-01-11 20:55:00	5.5	75.7	13	0	0	0	0	0	0	0	0	0
1567	2017-01-11 21:05:00	5.4	76	13	0	0	0	0	0	0	0	0	0
1568	2017-01-11 21:15:00	5.3	76.3	13	0	0	0	0	0	0	0	0	0
1569	2017-01-11 21:25:00	5.4	75.7	13	0	0	0	0	0	0	0	0	0
1570	2017-01-11 21:35:00	5.3	76	13	0	0	0	0	0	0	0	0	0
1571	2017-01-11 21:45:00	5.2	76.5	13	0	0	0	0	0	0	0	0	0
1572	2017-01-11 21:55:00	5.4	75.2	13	0	0	0	0	0	0	0	0	0
1573	2017-01-11 22:05:00	5.4	74.9	13	0	0	0	0	0	0	0	0	0
1574	2017-01-11 22:15:00	5.4	74.7	13	0	0	0	0	0	0	0	0	0
1575	2017-01-11 22:25:00	5.2	74.9	13	0	0	0	0	0	0	0	0	0
1576	2017-01-11 22:35:00	5.1	76	13	0	0	0	0	0	0	0	0	0
1577	2017-01-11 22:45:00	5.1	75.9	13	0	0	0	0	0	0	0	0	0
1578	2017-01-11 22:55:00	5	75.9	13	0	0	0	0	0	0	0	0	0
1579	2017-01-11 23:05:00	4.8	77	13	0	0	0	0	0	0	0	0	0
1580	2017-01-11 23:15:00	4.7	76.8	13	0	0	0	0	0	0	0	0	0
1581	2017-01-11 23:25:00	4.7	76.8	13	0	0	0	0	0	0	0	0	0
1582	2017-01-11 23:35:00	4.6	76.3	13	0	0	0	0	0	0	0	0	0
1583	2017-01-11 23:45:00	4.8	75.7	13	0	0	0	0	0	0	0	0	0
1584	2017-01-11 23:55:00	4.7	75.1	13	0	0	0	0	0	0	0	0	0
1585	2017-01-12 00:05:00	4.6	75.6	13	0	0	0	0	0	0	0	0	0
1586	2017-01-12 00:15:00	4.6	75.2	13	0	0	0	0	0	0	0	0	0
1587	2017-01-12 00:25:00	4.6	75.4	13	0	0	0	0	0	0	0	0	0
1588	2017-01-12 00:35:00	4.5	75.4	13	0	0	0	0	0	0	0	0	0
1589	2017-01-12 00:45:00	4.5	75.3	13	0	0	0	0	0	0	0	0	0
1590	2017-01-12 00:55:00	4.3	75.6	13	0	0	0	0	0	0	0	0	0
1591	2017-01-12 01:05:00	4.3	75.6	13	0	0	0	0	0	0	0	0	0
1592	2017-01-12 01:15:00	4.2	75.2	13	0	0	0	0	0	0	0	0	0
1593	2017-01-12 01:25:00	4.2	75.3	13	0	0	0	0	0	0	0	0	0
1594	2017-01-12 01:35:00	4.3	74.9	13	0	0	0	0	0	0	0	0	0
1595	2017-01-12 01:45:00	4.3	74.9	13	0	0	0	0	0	0	0	0	0
1596	2017-01-12 01:55:00	4.4	74.8	13	0	0	0	0	0	0	0	0	0
1597	2017-01-12 02:05:00	4.4	75.3	13	0	0	0	0	0	0	0	0	0
1598	2017-01-12 02:15:00	4.5	74.6	13	0	0	0	0	0	0	0	0	0
1599	2017-01-12 02:25:00	4.5	74.7	13	0	0	0	0	0	0	0	0	0
1600	2017-01-12 02:35:00	4.4	75.4	13	0	0	0	0	0	0	0	0	0
1601	2017-01-12 02:45:00	4.4	75.9	13	0	0	0	0	0	0	0	0	0
1602	2017-01-12 02:55:00	4.3	76.5	13	0	0	0	0	0	0	0	0	0
1603	2017-01-12 03:05:00	4.2	77.2	13	0	0	0	0	0	0	0	0	0
1604	2017-01-12 03:15:00	4.3	77.1	13	0	0	0	0	0	0	0	0	0
1605	2017-01-12 03:25:00	4.3	76.9	13	0	0	0	0	0	0	0	0	0
1606	2017-01-12 03:35:00	4.2	76.8	13	0	0	0	0	0	0	0	0	0
1607	2017-01-12 03:45:00	4.3	76.7	13	0	0	0	0	0	0	0	0	0
1608	2017-01-12 03:55:00	4.2	77.2	13	0	0	0	0	0	0	0	0	0
1609	2017-01-12 04:05:00	4.2	77.7	13	0	0	0	0	0	0	0	0	0
1610	2017-01-12 04:15:00	4.2	77.2	13	0	0	0	0	0	0	0	0	0
1611	2017-01-12 04:25:00	4.1	77.8	13	0	0	0	0	0	0	0	0	0
1612	2017-01-12 04:35:00	4.3	76.8	13	0	0	0	0	0	0	0	0	0
1613	2017-01-12 04:45:00	4.2	77.1	13	0	0	0	0	0	0	0	0	0
1614	2017-01-12 04:55:00	4.2	77.2	13	0	0	0	0	0	0	0	0	0
1615	2017-01-12 05:05:00	4.1	77.8	13	0	0	0	0	0	0	0	0	0
1616	2017-01-12 05:15:00	4.1	77.7	13	0	0	0	0	0	0	0	0	0
1617	2017-01-12 05:25:00	4.1	77.7	13	0	0	0	0	0	0	0	0	0
1618	2017-01-12 05:35:00	4.2	77.4	13	0	0	0	0	0	0	0	0	0
1619	2017-01-12 05:45:00	4.2	77.6	13	0	0	0	0	0	0	0	0	0
1620	2017-01-12 05:55:00	4.2	77.8	13	0	0	0	0	0	0	0	0	0
1621	2017-01-12 06:05:00	4.2	77.6	13	0	0	0	0	0	0	0	0	0
1622	2017-01-12 06:15:00	4.3	77.3	13	0	0	0	0	0	0	0	0	0
1623	2017-01-12 06:25:00	4.4	76.9	13	0	0	0	0	0	0	0	0	0
1624	2017-01-12 06:35:00	4.4	77.4	13	0	0	0	0	0	0	0	0	0
1625	2017-01-12 06:45:00	4.5	76.8	13	0	0	0	0	0	0	0	0	0
1626	2017-01-12 06:55:00	4.5	77.3	13	0	0	0	0	0	0	0	0	0
1627	2017-01-12 07:05:00	4.6	77.6	13	0	0	0	0	0	0	0	0	0
1628	2017-01-12 07:15:00	4.7	77.6	13	0	0	0	0	0	0	0	0	0
1629	2017-01-12 07:25:00	4.7	78	13	0	1	0	0	0	0	0	0	0
1630	2017-01-12 07:35:00	4.4	78.9	13	0	3	0	0	1	0	0	1	1
1631	2017-01-12 07:45:00	4.3	78.8	13	0	6	0	1	1	1	1	1	2
1632	2017-01-12 07:55:00	4.1	79.5	13	0	10	1	1	2	1	1	2	3
1633	2017-01-12 08:05:00	4.1	79.8	13	0	14	1	1	2	1	1	3	4
1634	2017-01-12 08:15:00	4.1	80	13	0	20	2	2	3	2	2	5	6
1635	2017-01-12 08:25:00	4.2	80	13	0	31	3	3	5	3	3	7	10
1636	2017-01-12 08:35:00	4.3	80	13	0	39	3	4	6	4	4	9	12
1637	2017-01-12 08:45:00	4.4	80	13	0	45	4	5	7	5	5	10	14
1638	2017-01-12 08:55:00	4.5	80	13	0	52	4	6	8	5	5	12	16
1639	2017-01-12 09:05:00	4.6	80	13	0	59	5	6	10	6	6	13	19
1640	2017-01-12 09:15:00	4.7	79.5	13	0	68	6	7	11	7	7	15	22
1641	2017-01-12 09:25:00	4.9	79.7	13	0	78	7	8	13	8	8	18	25
1642	2017-01-12 09:35:00	4.9	80	13	0	74	6	8	12	7	8	17	24
1643	2017-01-12 09:45:00	4.9	79.9	13	0	76	6	8	12	8	8	17	24
1644	2017-01-12 09:55:00	5.1	79.3	13	0	86	7	9	14	9	9	19	27
1645	2017-01-12 10:05:00	5.5	78.4	13	0	82	7	9	13	8	8	19	26
1646	2017-01-12 10:15:00	5.6	78.1	13	0	77	7	8	12	8	8	17	25
1647	2017-01-12 10:25:00	5.6	79.1	13	0	82	7	9	13	8	8	19	26
1648	2017-01-12 10:35:00	5.6	79.9	13	0	82	7	9	13	8	8	19	26
1649	2017-01-12 10:45:00	5.7	79.7	13	0	79	7	8	13	8	8	18	25
1650	2017-01-12 10:55:00	5.6	79.3	13	0	94	8	10	15	9	10	21	30
1651	2017-01-12 11:05:00	5.8	80	13	0	118	10	13	19	12	12	27	38
1652	2017-01-12 11:15:00	5.9	79.3	13	0	133	11	14	21	13	14	30	42
1653	2017-01-12 11:25:00	6.1	78.1	13	0	158	13	17	25	16	16	36	50
1654	2017-01-12 11:35:00	6.3	76.9	13	0	194	17	21	31	19	20	44	62
1655	2017-01-12 11:45:00	6.5	77.4	13	0	180	15	19	29	18	18	41	57
1656	2017-01-12 11:55:00	6.7	76.5	13	0	219	19	23	35	22	22	50	70
1657	2017-01-12 12:05:00	7.1	74.7	13	0	260	22	28	42	26	27	59	83
1658	2017-01-12 12:15:00	6.8	73.5	13	0	131	11	14	21	13	13	30	42
1659	2017-01-12 12:25:00	6.6	74.7	13	0	95	8	10	15	9	10	21	30
1660	2017-01-12 12:35:00	6.6	74.5	13	0	111	10	12	18	11	11	25	36
1661	2017-01-12 12:45:00	6.7	75.2	13	0	108	9	11	17	11	11	24	34
1662	2017-01-12 12:55:00	6.7	74.6	13	0	99	8	11	16	10	10	22	31
1663	2017-01-12 13:05:00	6.9	74.7	13	0	117	10	12	19	12	12	26	37
1664	2017-01-12 13:15:00	6.9	74.7	13	0	114	10	12	18	11	12	26	36
1665	2017-01-12 13:25:00	6.8	73.3	13	0	89	8	9	14	9	9	20	28
1666	2017-01-12 13:35:00	6.8	74.3	13	0	72	6	8	12	7	7	16	23
1667	2017-01-12 13:45:00	6.7	75	13	0	52	4	6	8	5	5	12	17
1668	2017-01-12 13:55:00	6.7	73.9	13	0	43	4	5	7	4	4	10	14
1669	2017-01-12 14:05:00	6.7	74.7	13	0	42	4	4	7	4	4	9	13
1670	2017-01-12 14:15:00	6.6	75.1	13	0	49	4	5	8	5	5	11	16
1671	2017-01-12 14:25:00	6.7	75	13	0	46	4	5	7	5	5	10	15
1672	2017-01-12 14:35:00	6.7	74.2	13	0	37	3	4	6	4	4	8	12
1673	2017-01-12 14:45:00	6.6	74.2	13	0	31	3	3	5	3	3	7	10
1674	2017-01-12 14:55:00	6.4	75.3	13	0	21	2	2	3	2	2	5	7
1675	2017-01-12 15:05:00	6.3	75.9	13	0	11	1	1	2	1	1	2	3
1676	2017-01-12 15:15:00	6.3	75.6	13	0	8	1	1	1	1	1	2	2
1677	2017-01-12 15:25:00	6.2	76.1	13	0	5	0	1	1	0	0	1	2
1678	2017-01-12 15:35:00	6.1	76.4	13	0	2	0	0	0	0	0	0	1
1679	2017-01-12 15:45:00	5.9	79.5	13	0	1	0	0	0	0	0	0	0
1680	2017-01-12 15:55:00	5.5	80	13	0	1	0	0	0	0	0	0	0
1681	2017-01-12 16:05:00	5.4	80	13	0	0	0	0	0	0	0	0	0
1682	2017-01-12 16:15:00	5.4	80	13	0	0	0	0	0	0	0	0	0
1683	2017-01-12 16:25:00	5.3	80	13	0	0	0	0	0	0	0	0	0
1684	2017-01-12 16:35:00	5.3	80	13	0	0	0	0	0	0	0	0	0
1685	2017-01-12 16:45:00	5.3	80	13	0	0	0	0	0	0	0	0	0
1686	2017-01-12 16:55:00	5.2	80	13	0	0	0	0	0	0	0	0	0
1687	2017-01-12 17:05:00	5.2	80	13	0	0	0	0	0	0	0	0	0
1688	2017-01-12 17:15:00	5.2	80	13	0	0	0	0	0	0	0	0	0
1689	2017-01-12 17:25:00	5.1	80	13	0	0	0	0	0	0	0	0	0
1690	2017-01-12 17:35:00	5.1	80	13	0	0	0	0	0	0	0	0	0
1691	2017-01-12 17:45:00	5	80	13	0	0	0	0	0	0	0	0	0
1692	2017-01-12 17:55:00	4.9	80	13	0	0	0	0	0	0	0	0	0
1693	2017-01-12 18:05:00	4.8	80	13	0	0	0	0	0	0	0	0	0
1694	2017-01-12 18:15:00	4.7	80	13	0	0	0	0	0	0	0	0	0
1695	2017-01-12 18:25:00	4.5	80	13	2.06	0	0	0	0	0	0	0	0
1696	2017-01-12 18:35:00	4.3	80	13	0	0	0	0	0	0	0	0	0
1697	2017-01-12 18:45:00	4.1	80	13	0	0	0	0	0	0	0	0	0
1698	2017-01-12 18:55:00	4.1	80	13	0	0	0	0	0	0	0	0	0
1699	2017-01-12 19:05:00	4	80	13	0	0	0	0	0	0	0	0	0
1700	2017-01-12 19:15:00	3.9	80	13	0	0	0	0	0	0	0	0	0
1701	2017-01-12 19:25:00	3.8	80	13	0	0	0	0	0	0	0	0	0
1702	2017-01-12 19:35:00	3.7	80	13	0	0	0	0	0	0	0	0	0
1703	2017-01-12 19:45:00	3.7	80	13	0	0	0	0	0	0	0	0	0
1704	2017-01-12 19:55:00	3.6	80	13	0	0	0	0	0	0	0	0	0
1705	2017-01-12 20:05:00	3.6	80	13	0	0	0	0	0	0	0	0	0
1706	2017-01-12 20:15:00	3.5	80	13	0	0	0	0	0	0	0	0	0
1707	2017-01-12 20:25:00	3.5	80	13	0	0	0	0	0	0	0	0	0
1708	2017-01-12 20:35:00	3.4	80	13	0	0	0	0	0	0	0	0	0
1709	2017-01-12 20:45:00	3.4	80	13	0	0	0	0	0	0	0	0	0
1710	2017-01-12 20:55:00	3.4	80	13	0	0	0	0	0	0	0	0	0
1711	2017-01-12 21:05:00	3.4	80	13	0	0	0	0	0	0	0	0	0
1712	2017-01-12 21:15:00	3.7	80	13	0	0	0	0	0	0	0	0	0
1713	2017-01-12 21:25:00	3.5	80	13	0	0	0	0	0	0	0	0	0
1714	2017-01-12 21:35:00	3.3	80	13	0	0	0	0	0	0	0	0	0
1715	2017-01-12 21:45:00	3.6	80	13	0	0	0	0	0	0	0	0	0
1716	2017-01-12 21:55:00	3.8	80	13	0	0	0	0	0	0	0	0	0
1717	2017-01-12 22:05:00	4.2	80	13	0	0	0	0	0	0	0	0	0
1718	2017-01-12 22:15:00	4.3	80	13	0	0	0	0	0	0	0	0	0
1719	2017-01-12 22:25:00	4	80	13	0	0	0	0	0	0	0	0	0
1720	2017-01-12 22:35:00	4.1	80	13	0	0	0	0	0	0	0	0	0
1721	2017-01-12 22:45:00	5.5	80	13	0	0	0	0	0	0	0	0	0
1722	2017-01-12 22:55:00	6.3	72.9	13	0	0	0	0	0	0	0	0	0
1723	2017-01-12 23:05:00	6.1	73.4	13	0	0	0	0	0	0	0	0	0
1724	2017-01-12 23:15:00	6.2	72.1	13	0	0	0	0	0	0	0	0	0
1725	2017-01-12 23:25:00	6.1	73	13	0	0	0	0	0	0	0	0	0
1726	2017-01-12 23:35:00	5.9	74	13	0	0	0	0	0	0	0	0	0
1727	2017-01-12 23:45:00	5.7	75.2	13	0	0	0	0	0	0	0	0	0
1728	2017-01-12 23:55:00	5.2	78.7	13	0	0	0	0	0	0	0	0	0
1729	2017-01-13 00:05:00	4.7	80	13	0	0	0	0	0	0	0	0	0
1730	2017-01-13 00:15:00	4.5	80	13	0	0	0	0	0	0	0	0	0
1731	2017-01-13 00:25:00	3.8	80	13	0	0	0	0	0	0	0	0	0
1732	2017-01-13 00:35:00	3.4	80	13	0	0	0	0	0	0	0	0	0
1733	2017-01-13 00:45:00	3.1	80	13	0	0	0	0	0	0	0	0	0
1734	2017-01-13 00:55:00	3	80	13	0	0	0	0	0	0	0	0	0
1735	2017-01-13 01:05:00	3	80	13	0	0	0	0	0	0	0	0	0
1736	2017-01-13 01:15:00	3.1	80	13	0	0	0	0	0	0	0	0	0
1737	2017-01-13 01:25:00	3	80	13	0	0	0	0	0	0	0	0	0
1738	2017-01-13 01:35:00	2.4	80	13	0	0	0	0	0	0	0	0	0
1739	2017-01-13 01:45:00	1.7	80	13	0	0	0	0	0	0	0	0	0
1740	2017-01-13 01:55:00	1	80	13	0	0	0	0	0	0	0	0	0
1741	2017-01-13 02:05:00	0.8	80	13	0	0	0	0	0	0	0	0	0
1742	2017-01-13 02:15:00	0.7	80	13	0	0	0	0	0	0	0	0	0
1743	2017-01-13 02:25:00	0.6	80	13	0	0	0	0	0	0	0	0	0
1744	2017-01-13 02:35:00	0.6	80	13	0	0	0	0	0	0	0	0	0
1745	2017-01-13 02:45:00	0.5	80	13	0	0	0	0	0	0	0	0	0
1746	2017-01-13 02:55:00	0.5	80	13	0	0	0	0	0	0	0	0	0
1747	2017-01-13 03:05:00	0.5	80	13	0	0	0	0	0	0	0	0	0
1748	2017-01-13 03:15:00	0.5	80	13	0	0	0	0	0	0	0	0	0
1749	2017-01-13 03:25:00	0.6	80	13	0	0	0	0	0	0	0	0	0
1750	2017-01-13 03:35:00	0.6	80	13	0	0	0	0	0	0	0	0	0
1751	2017-01-13 03:45:00	0.6	80	13	0	0	0	0	0	0	0	0	0
1752	2017-01-13 03:55:00	0.7	80	13	0	0	0	0	0	0	0	0	0
1753	2017-01-13 04:05:00	0.8	80	13	0	0	0	0	0	0	0	0	0
1754	2017-01-13 04:15:00	0.8	80	13	0	0	0	0	0	0	0	0	0
1755	2017-01-13 04:25:00	0.8	80	13	0	0	0	0	0	0	0	0	0
1756	2017-01-13 04:35:00	0.8	80	13	0	0	0	0	0	0	0	0	0
1757	2017-01-13 04:45:00	0.9	80	13	0	0	0	0	0	0	0	0	0
1758	2017-01-13 04:55:00	1.2	80	13	0	0	0	0	0	0	0	0	0
1759	2017-01-13 05:05:00	1.3	80	13	0	0	0	0	0	0	0	0	0
1760	2017-01-13 05:15:00	1.3	80	13	0	0	0	0	0	0	0	0	0
1761	2017-01-13 05:25:00	1.2	80	13	0	0	0	0	0	0	0	0	0
1762	2017-01-13 05:35:00	1.2	80	13	0	0	0	0	0	0	0	0	0
1763	2017-01-13 05:45:00	1.1	80	13	0	0	0	0	0	0	0	0	0
1764	2017-01-13 05:55:00	1	80	13	0	0	0	0	0	0	0	0	0
1765	2017-01-13 06:05:00	1.2	80	13	0	0	0	0	0	0	0	0	0
1766	2017-01-13 06:15:00	1.4	80	13	0	0	0	0	0	0	0	0	0
1767	2017-01-13 06:25:00	1.5	80	13	0	0	0	0	0	0	0	0	0
1768	2017-01-13 06:35:00	1.6	80	13	0	0	0	0	0	0	0	0	0
1769	2017-01-13 06:45:00	1.6	80	13	0	0	0	0	0	0	0	0	0
1770	2017-01-13 06:55:00	1.6	80	13	0	0	0	0	0	0	0	0	0
1771	2017-01-13 07:05:00	1.5	80	13	0	0	0	0	0	0	0	0	0
1772	2017-01-13 07:15:00	1.5	80	13	0	0	0	0	0	0	0	0	0
1773	2017-01-13 07:25:00	1.4	80	13	0	2	0	0	0	0	0	0	1
1774	2017-01-13 07:35:00	1.5	80	13	0	2	0	0	0	0	0	1	1
1775	2017-01-13 07:45:00	1.4	80	13	0	6	0	1	1	1	1	1	2
1776	2017-01-13 07:55:00	1.4	80	13	0	10	1	1	2	1	1	2	3
1777	2017-01-13 08:05:00	1.4	80	13	0	12	1	1	2	1	1	3	4
1778	2017-01-13 08:15:00	1.4	80	13	0	17	1	2	3	2	2	4	6
1779	2017-01-13 08:25:00	1.4	80	13	0	19	2	2	3	2	2	4	6
1780	2017-01-13 08:35:00	1.4	80	13	0	24	2	3	4	2	2	5	8
1781	2017-01-13 08:45:00	1.4	80	13	0	23	2	2	4	2	2	5	7
1782	2017-01-13 08:55:00	1.3	80	13	0	20	2	2	3	2	2	4	6
1783	2017-01-13 09:05:00	1.1	80	13	0	10	1	1	2	1	1	2	3
1784	2017-01-13 09:15:00	1.2	80	13	0	12	1	1	2	1	1	3	4
1785	2017-01-13 09:25:00	1.3	80	13	0	25	2	3	4	3	3	6	8
1786	2017-01-13 09:35:00	1.3	80	13	0	25	2	3	4	3	3	6	8
1787	2017-01-13 09:45:00	1.1	80	13	0	17	1	2	3	2	2	4	6
1788	2017-01-13 09:55:00	1	80	13	0	16	1	2	3	2	2	4	5
1789	2017-01-13 10:05:00	0.9	80	13	0	21	2	2	3	2	2	5	7
1790	2017-01-13 10:15:00	0.9	80	13	0	14	1	2	2	1	1	3	5
1791	2017-01-13 10:25:00	0.7	80	13	0	23	2	2	4	2	2	5	7
1792	2017-01-13 10:35:00	0.9	80	13	0	54	5	6	9	5	5	12	17
1793	2017-01-13 10:45:00	0.9	80	13	0	58	5	6	9	6	6	13	19
1794	2017-01-13 10:55:00	0.9	80	13	0	47	4	5	8	5	5	11	15
1795	2017-01-13 11:05:00	1	80	13	0	61	5	7	10	6	6	14	20
1796	2017-01-13 11:15:00	1.1	80	13	0	49	4	5	8	5	5	11	16
1797	2017-01-13 11:25:00	1.1	80	13	0	58	5	6	9	6	6	13	18
1798	2017-01-13 11:35:00	1.1	80	13	0	34	3	4	6	3	4	8	11
1799	2017-01-13 11:45:00	1.3	80	13	0	60	5	6	10	6	6	13	19
1800	2017-01-13 11:55:00	1.4	80	13	0	56	5	6	9	6	6	13	18
1801	2017-01-13 12:05:00	1.3	80	13	0	51	4	5	8	5	5	12	16
1802	2017-01-13 12:15:00	1.4	80	13	0	104	9	11	17	10	11	24	33
1803	2017-01-13 12:25:00	1.7	80	13	0	131	11	14	21	13	13	30	42
1804	2017-01-13 12:35:00	2	80	13	4.66	155	13	17	25	15	16	35	49
1805	2017-01-13 12:45:00	2.1	80	13	0	151	13	16	24	15	15	34	48
1806	2017-01-13 12:55:00	2.2	80	13	0	116	10	12	19	12	12	26	37
1807	2017-01-13 13:05:00	2	80	13	0	52	4	6	8	5	5	12	17
1808	2017-01-13 13:15:00	2	80	13	0	47	4	5	8	5	5	11	15
1809	2017-01-13 13:25:00	2.2	80	13	0	58	5	6	9	6	6	13	19
1810	2017-01-13 13:35:00	2.4	80	13	0	50	4	5	8	5	5	11	16
1811	2017-01-13 13:45:00	2.4	80	13	0	64	5	7	10	6	7	15	20
1812	2017-01-13 13:55:00	2.6	80	13	0	83	7	9	13	8	9	19	27
1813	2017-01-13 14:05:00	2.4	80	13	0	50	4	5	8	5	5	11	16
1814	2017-01-13 14:15:00	2.4	80	13	0	71	6	8	11	7	7	16	23
1815	2017-01-13 14:25:00	2.6	79.9	13	0	82	7	9	13	8	8	19	26
1816	2017-01-13 14:35:00	2.6	79.6	13	0	84	7	9	13	8	9	19	27
1817	2017-01-13 14:45:00	2.5	77.9	13	0	64	5	7	10	6	7	15	20
1818	2017-01-13 14:55:00	2.4	78.6	13	0	49	4	5	8	5	5	11	15
1819	2017-01-13 15:05:00	2.2	79.7	13	0	24	2	3	4	2	2	6	8
1820	2017-01-13 15:15:00	2.1	80	13	0	19	2	2	3	2	2	4	6
1821	2017-01-13 15:25:00	2	80	13	0	13	1	1	2	1	1	3	4
1822	2017-01-13 15:35:00	1.9	80	13	0	7	1	1	1	1	1	2	2
1823	2017-01-13 15:45:00	1.7	80	13	0	4	0	0	1	0	0	1	1
1824	2017-01-13 15:55:00	1.6	80	13	0	2	0	0	0	0	0	0	1
1825	2017-01-13 16:05:00	1.5	80	13	0	0	0	0	0	0	0	0	0
1826	2017-01-13 16:15:00	1.5	80	13	0	0	0	0	0	0	0	0	0
1827	2017-01-13 16:25:00	1.6	80	13	0	0	0	0	0	0	0	0	0
1828	2017-01-13 16:35:00	1.6	80	13	0	0	0	0	0	0	0	0	0
1829	2017-01-13 16:45:00	1.6	80	13	0	0	0	0	0	0	0	0	0
1830	2017-01-13 16:55:00	1.6	80	13	0	0	0	0	0	0	0	0	0
1831	2017-01-13 17:05:00	1.6	80	13	0	0	0	0	0	0	0	0	0
1832	2017-01-13 17:15:00	1.7	80	13	0	0	0	0	0	0	0	0	0
1833	2017-01-13 17:25:00	1.7	80	13	0	0	0	0	0	0	0	0	0
1834	2017-01-13 17:35:00	1.7	80	13	0	0	0	0	0	0	0	0	0
1835	2017-01-13 17:45:00	1.7	80	13	0	0	0	0	0	0	0	0	0
1836	2017-01-13 17:55:00	1.8	80	13	0	0	0	0	0	0	0	0	0
1837	2017-01-13 18:05:00	1.8	80	13	0	0	0	0	0	0	0	0	0
1838	2017-01-13 18:15:00	1.7	80	13	0	0	0	0	0	0	0	0	0
1839	2017-01-13 18:25:00	1.5	80	13	0	0	0	0	0	0	0	0	0
1840	2017-01-13 18:35:00	1.4	80	13	0	0	0	0	0	0	0	0	0
1841	2017-01-13 18:45:00	1.1	80	13	0	0	0	0	0	0	0	0	0
1842	2017-01-13 18:55:00	0.9	80	13	0	0	0	0	0	0	0	0	0
1843	2017-01-13 19:05:00	0.9	80	13	0	0	0	0	0	0	0	0	0
1844	2017-01-13 19:15:00	1	80	13	0	0	0	0	0	0	0	0	0
1845	2017-01-13 19:25:00	1.2	80	13	0	0	0	0	0	0	0	0	0
1846	2017-01-13 19:35:00	1.6	80	13	0	0	0	0	0	0	0	0	0
1847	2017-01-13 19:45:00	1.8	80	13	0	0	0	0	0	0	0	0	0
1848	2017-01-13 19:55:00	1.8	80	13	0	0	0	0	0	0	0	0	0
1849	2017-01-13 20:05:00	2.1	80	13	0	0	0	0	0	0	0	0	0
1850	2017-01-13 20:15:00	2.3	80	13	0	0	0	0	0	0	0	0	0
1851	2017-01-13 20:25:00	2.4	80	13	0	0	0	0	0	0	0	0	0
1852	2017-01-13 20:35:00	2.5	80	13	0	0	0	0	0	0	0	0	0
1853	2017-01-13 20:45:00	2.5	80	13	0	0	0	0	0	0	0	0	0
1854	2017-01-13 20:55:00	2.6	80	13	0	0	0	0	0	0	0	0	0
1855	2017-01-13 21:05:00	2.8	80	13	0	0	0	0	0	0	0	0	0
1856	2017-01-13 21:15:00	2.9	80	13	0	0	0	0	0	0	0	0	0
1857	2017-01-13 21:25:00	3.1	80	13	0	0	0	0	0	0	0	0	0
1858	2017-01-13 21:35:00	3.2	80	13	0	0	0	0	0	0	0	0	0
1859	2017-01-13 21:45:00	3.5	80	13	0	0	0	0	0	0	0	0	0
1860	2017-01-13 21:55:00	3.7	80	13	0	0	0	0	0	0	0	0	0
1861	2017-01-13 22:05:00	3.6	80	13	0	0	0	0	0	0	0	0	0
1862	2017-01-13 22:15:00	3.6	80	13	0	0	0	0	0	0	0	0	0
1863	2017-01-13 22:25:00	3.7	80	13	0	0	0	0	0	0	0	0	0
1864	2017-01-13 22:35:00	3.7	80	13	0	0	0	0	0	0	0	0	0
1865	2017-01-13 22:45:00	3.6	80	13	0	0	0	0	0	0	0	0	0
1866	2017-01-13 22:55:00	3.8	80	13	0	0	0	0	0	0	0	0	0
1867	2017-01-13 23:05:00	3.7	80	13	0	0	0	0	0	0	0	0	0
1868	2017-01-13 23:15:00	3.6	80	13	0	0	0	0	0	0	0	0	0
1869	2017-01-13 23:25:00	3.6	80	13	0	0	0	0	0	0	0	0	0
1870	2017-01-13 23:35:00	3.5	80	13	0	0	0	0	0	0	0	0	0
1871	2017-01-13 23:45:00	3.6	80	13	0	0	0	0	0	0	0	0	0
1872	2017-01-13 23:55:00	3.7	80	13	0	0	0	0	0	0	0	0	0
1873	2017-01-14 00:05:00	3.9	80	13	0	0	0	0	0	0	0	0	0
1874	2017-01-14 00:15:00	3.8	80	13	0	0	0	0	0	0	0	0	0
1875	2017-01-14 00:25:00	3.8	80	13	0	0	0	0	0	0	0	0	0
1876	2017-01-14 00:35:00	3.8	80	13	0	0	0	0	0	0	0	0	0
1877	2017-01-14 00:45:00	3.7	80	13	0	0	0	0	0	0	0	0	0
1878	2017-01-14 00:55:00	3.7	80	13	0	0	0	0	0	0	0	0	0
1879	2017-01-14 01:05:00	3.5	80	13	0	0	0	0	0	0	0	0	0
1880	2017-01-14 01:15:00	3.4	80	13	0	0	0	0	0	0	0	0	0
1881	2017-01-14 01:25:00	3.3	80	13	0	0	0	0	0	0	0	0	0
1882	2017-01-14 01:35:00	3.2	80	13	0	0	0	0	0	0	0	0	0
1883	2017-01-14 01:45:00	3.1	80	13	0	0	0	0	0	0	0	0	0
1884	2017-01-14 01:55:00	3.1	80	13	0	0	0	0	0	0	0	0	0
1885	2017-01-14 02:05:00	3	80	13	0	0	0	0	0	0	0	0	0
1886	2017-01-14 02:15:00	3	80	13	0	0	0	0	0	0	0	0	0
1887	2017-01-14 02:25:00	2.8	80	13	0	0	0	0	0	0	0	0	0
1888	2017-01-14 02:35:00	2.6	80	13	0	0	0	0	0	0	0	0	0
1889	2017-01-14 02:45:00	2.6	80	13	0	0	0	0	0	0	0	0	0
1890	2017-01-14 02:55:00	2.6	80	13	0	0	0	0	0	0	0	0	0
1891	2017-01-14 03:05:00	2.5	80	13	0	0	0	0	0	0	0	0	0
1892	2017-01-14 03:15:00	2.3	80	13	0	0	0	0	0	0	0	0	0
1893	2017-01-14 03:25:00	2	80	13	0	0	0	0	0	0	0	0	0
1894	2017-01-14 03:35:00	2	80	13	0	0	0	0	0	0	0	0	0
1895	2017-01-14 03:45:00	1.9	80	13	0	0	0	0	0	0	0	0	0
1896	2017-01-14 03:55:00	1.9	80	13	0	0	0	0	0	0	0	0	0
1897	2017-01-14 04:05:00	1.9	80	13	0	0	0	0	0	0	0	0	0
1898	2017-01-14 04:15:00	1.7	80	13	0	0	0	0	0	0	0	0	0
1899	2017-01-14 04:25:00	1.7	80	13	0	0	0	0	0	0	0	0	0
1900	2017-01-14 04:35:00	1.7	80	13	0	0	0	0	0	0	0	0	0
1901	2017-01-14 04:45:00	1.7	80	13	0	0	0	0	0	0	0	0	0
1902	2017-01-14 04:55:00	1.6	80	13	0	0	0	0	0	0	0	0	0
1903	2017-01-14 05:05:00	1.5	80	13	0	0	0	0	0	0	0	0	0
1904	2017-01-14 05:15:00	1.5	80	13	0	0	0	0	0	0	0	0	0
1905	2017-01-14 05:25:00	1.5	80	13	0	0	0	0	0	0	0	0	0
1906	2017-01-14 05:35:00	1.4	80	13	0	0	0	0	0	0	0	0	0
1907	2017-01-14 05:45:00	1.5	80	13	0	0	0	0	0	0	0	0	0
1908	2017-01-14 05:55:00	1.5	80	13	0	0	0	0	0	0	0	0	0
1909	2017-01-14 06:05:00	1.5	80	13	0	0	0	0	0	0	0	0	0
1910	2017-01-14 06:15:00	1.5	80	13	0	0	0	0	0	0	0	0	0
1911	2017-01-14 06:25:00	1.2	80	13	0	0	0	0	0	0	0	0	0
1912	2017-01-14 06:35:00	0.9	80	13	0	0	0	0	0	0	0	0	0
1913	2017-01-14 06:45:00	0.9	80	13	0	0	0	0	0	0	0	0	0
1914	2017-01-14 06:55:00	0.7	80	13	0	0	0	0	0	0	0	0	0
1915	2017-01-14 07:05:00	0.7	80	13	0	0	0	0	0	0	0	0	0
1916	2017-01-14 07:15:00	0.8	80	13	0	1	0	0	0	0	0	0	0
1917	2017-01-14 07:25:00	0.8	80	13	0	2	0	0	0	0	0	0	0
1918	2017-01-14 07:35:00	0.9	80	13	0	4	0	0	1	0	0	1	1
1919	2017-01-14 07:45:00	1	80	13	0	6	1	1	1	1	1	1	2
1920	2017-01-14 07:55:00	1.1	80	13	0	11	1	1	2	1	1	2	3
1921	2017-01-14 08:05:00	1.1	80	13	0	15	1	2	2	1	2	3	5
1922	2017-01-14 08:15:00	1	80	13	0	25	2	3	4	2	3	6	8
1923	2017-01-14 08:25:00	1	80	13	0	39	3	4	6	4	4	9	13
1924	2017-01-14 08:35:00	1.1	80	13	0	39	3	4	6	4	4	9	12
1925	2017-01-14 08:45:00	1.1	80	13	0	39	3	4	6	4	4	9	12
1926	2017-01-14 08:55:00	1.2	80	13	0	44	4	5	7	4	5	10	14
1927	2017-01-14 09:05:00	1.2	80	13	0	35	3	4	6	3	4	8	11
1928	2017-01-14 09:15:00	1.2	80	13	0	32	3	3	5	3	3	7	10
1929	2017-01-14 09:25:00	1.3	80	13	0	45	4	5	7	5	5	10	14
1930	2017-01-14 09:35:00	1.4	80	13	0	58	5	6	9	6	6	13	19
1931	2017-01-14 09:45:00	1.5	80	13	0	67	6	7	11	7	7	15	21
1932	2017-01-14 09:55:00	1.5	80	13	0	43	4	5	7	4	4	10	14
1933	2017-01-14 10:05:00	1.5	80	13	0	55	5	6	9	5	6	12	18
1934	2017-01-14 10:15:00	1.7	80	13	0	76	7	8	12	8	8	17	24
1935	2017-01-14 10:25:00	1.9	80	13	0	102	9	11	16	10	10	23	33
1936	2017-01-14 10:35:00	2.1	80	13	0	115	10	12	18	11	12	26	37
1937	2017-01-14 10:45:00	2	80	13	0	105	9	11	17	10	11	24	33
1938	2017-01-14 10:55:00	2	80	13	0	139	12	15	22	14	14	31	44
1939	2017-01-14 11:05:00	2.5	80	13	0	177	15	19	28	18	18	40	56
1940	2017-01-14 11:15:00	2.3	80	13	0	153	13	16	25	15	16	35	49
1941	2017-01-14 11:25:00	2.1	80	13	0	101	9	11	16	10	10	23	32
1942	2017-01-14 11:35:00	2.3	80	13	0	150	13	16	24	15	15	34	48
1943	2017-01-14 11:45:00	2.2	80	13	0	119	10	13	19	12	12	27	38
1944	2017-01-14 11:55:00	2.3	80	13	0	149	13	16	24	15	15	34	48
1945	2017-01-14 12:05:00	2.6	80	13	0	163	14	17	26	16	17	37	52
1946	2017-01-14 12:15:00	2.3	80	13	0	115	10	12	19	12	12	26	37
1947	2017-01-14 12:25:00	2.3	80	13	0	119	10	13	19	12	12	27	38
1948	2017-01-14 12:35:00	2.9	80	13	0	212	18	23	34	21	22	48	68
1949	2017-01-14 12:45:00	3.1	80	13	0	203	17	22	33	20	21	46	65
1950	2017-01-14 12:55:00	3.1	79.1	13	0	195	17	21	31	20	20	44	62
1951	2017-01-14 13:05:00	2.7	80	13	0	97	8	10	16	10	10	22	31
1952	2017-01-14 13:15:00	2.7	79.6	13	0	107	9	11	17	11	11	24	34
1953	2017-01-14 13:25:00	2.7	80	13	0	48	4	5	8	5	5	11	15
1954	2017-01-14 13:35:00	2.2	80	13	0	16	1	2	3	2	2	4	5
1955	2017-01-14 13:45:00	1.9	80	13	0	26	2	3	4	3	3	6	8
1956	2017-01-14 13:55:00	1.8	80	13	0	16	1	2	3	2	2	4	5
1957	2017-01-14 14:05:00	1.8	80	13	0	14	1	1	2	1	1	3	4
1958	2017-01-14 14:15:00	1.8	80	13	0	10	1	1	2	1	1	2	3
1959	2017-01-14 14:25:00	1.9	80	13	0	13	1	1	2	1	1	3	4
1960	2017-01-14 14:35:00	1.9	80	13	0	11	1	1	2	1	1	2	4
1961	2017-01-14 14:45:00	2	80	13	0	19	2	2	3	2	2	4	6
1962	2017-01-14 14:55:00	2	80	13	0	25	2	3	4	2	3	6	8
1963	2017-01-14 15:05:00	1.9	80	13	0	10	1	1	2	1	1	2	3
1964	2017-01-14 15:15:00	1.7	80	13	0	5	0	0	1	0	0	1	1
1965	2017-01-14 15:25:00	1.5	80	13	0	2	0	0	0	0	0	0	1
1966	2017-01-14 15:35:00	1.3	80	13	0	1	0	0	0	0	0	0	0
1967	2017-01-14 15:45:00	1.1	80	13	0	1	0	0	0	0	0	0	0
1968	2017-01-14 15:55:00	1.1	80	13	0	1	0	0	0	0	0	0	0
1969	2017-01-14 16:05:00	1.3	80	13	0	1	0	0	0	0	0	0	0
1970	2017-01-14 16:15:00	1.5	80	13	0	0	0	0	0	0	0	0	0
1971	2017-01-14 16:25:00	1.7	80	13	0	0	0	0	0	0	0	0	0
1972	2017-01-14 16:35:00	1.7	80	13	0	0	0	0	0	0	0	0	0
1973	2017-01-14 16:45:00	1.6	80	13	0	0	0	0	0	0	0	0	0
1974	2017-01-14 16:55:00	1.4	80	13	0	0	0	0	0	0	0	0	0
1975	2017-01-14 17:05:00	1.3	80	13	0	0	0	0	0	0	0	0	0
1976	2017-01-14 17:15:00	1.3	80	13	0	0	0	0	0	0	0	0	0
1977	2017-01-14 17:25:00	1.3	80	13	0	0	0	0	0	0	0	0	0
1978	2017-01-14 17:35:00	1.2	80	13	0	0	0	0	0	0	0	0	0
1979	2017-01-14 17:45:00	1.4	80	13	0	0	0	0	0	0	0	0	0
1980	2017-01-14 17:55:00	1	80	13	0	0	0	0	0	0	0	0	0
1981	2017-01-14 18:05:00	0.8	80	13	0	0	0	0	0	0	0	0	0
1982	2017-01-14 18:15:00	1.1	80	13	0	0	0	0	0	0	0	0	0
1983	2017-01-14 18:25:00	1.4	80	13	0	0	0	0	0	0	0	0	0
1984	2017-01-14 18:35:00	1.3	80	13	0	0	0	0	0	0	0	0	0
1985	2017-01-14 18:45:00	1.5	80	13	0	0	0	0	0	0	0	0	0
1986	2017-01-14 18:55:00	1.5	80	13	0	0	0	0	0	0	0	0	0
1987	2017-01-14 19:05:00	1.4	80	13	0	0	0	0	0	0	0	0	0
1988	2017-01-14 19:15:00	0.9	80	13	0	0	0	0	0	0	0	0	0
1989	2017-01-14 19:25:00	0.9	80	13	0	0	0	0	0	0	0	0	0
1990	2017-01-14 19:35:00	1	80	13	0	0	0	0	0	0	0	0	0
1991	2017-01-14 19:45:00	1.1	80	13	0	0	0	0	0	0	0	0	0
1992	2017-01-14 19:55:00	1.1	80	13	0	0	0	0	0	0	0	0	0
1993	2017-01-14 20:05:00	1.2	80	13	0	0	0	0	0	0	0	0	0
1994	2017-01-14 20:15:00	1.1	80	13	0	0	0	0	0	0	0	0	0
1995	2017-01-14 20:25:00	1.1	80	13	0	0	0	0	0	0	0	0	0
1996	2017-01-14 20:35:00	1	80	13	0	0	0	0	0	0	0	0	0
1997	2017-01-14 20:45:00	0.9	80	13	0	0	0	0	0	0	0	0	0
1998	2017-01-14 20:55:00	0.9	80	13	0	0	0	0	0	0	0	0	0
1999	2017-01-14 21:05:00	0.9	80	13	0	0	0	0	0	0	0	0	0
[truncated: 50,561 more rows]
