# Supplementary material for: The AgraSim (Agricultural Simulator) facility for the comprehensive experimental simulation and analysis of environmental impacts on processes in the soil-plant-atmosphere system
Source: Copernicus journal article supplement (doi:10.5194/gi-14-353-2025), 2025-11-27
Supplement: Supplementary file [file gi-14-353-2025-supplement-title-page.pdf › gi-14-353-2025-supplement-title-page.pdf]

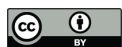

## *Supplement of*

# **The AgraSim (Agricultural Simulator) facility for the comprehensive experimental simulation and analysis of environmental impacts on processes in the soil-plant-atmosphere system**

**Joschka Neumann et al.**

*Correspondence to:* Joschka Neumann ([j.neumann@fz-juelich.de](mailto:j.neumann@fz-juelich.de))

- [gi-14-353-2025-supplement-title-page.pdf](#)
- [Climate data set Agrasim.xlsx](#)

The copyright of individual parts of the supplement might differ from the article licence.
